# Supplementary material for: Metabolic Profiling of a Mapping Population Exposes New Insights in the Regulation of Seed Metabolism and Seed, Fruit, and Plant Relations
Source: PLOS journal article supplement (doi:10.1371/journal.pgen.1002612), 2012-03-29

## Fruit metabolite network - $p < 0.01$ , $r > 0.3$

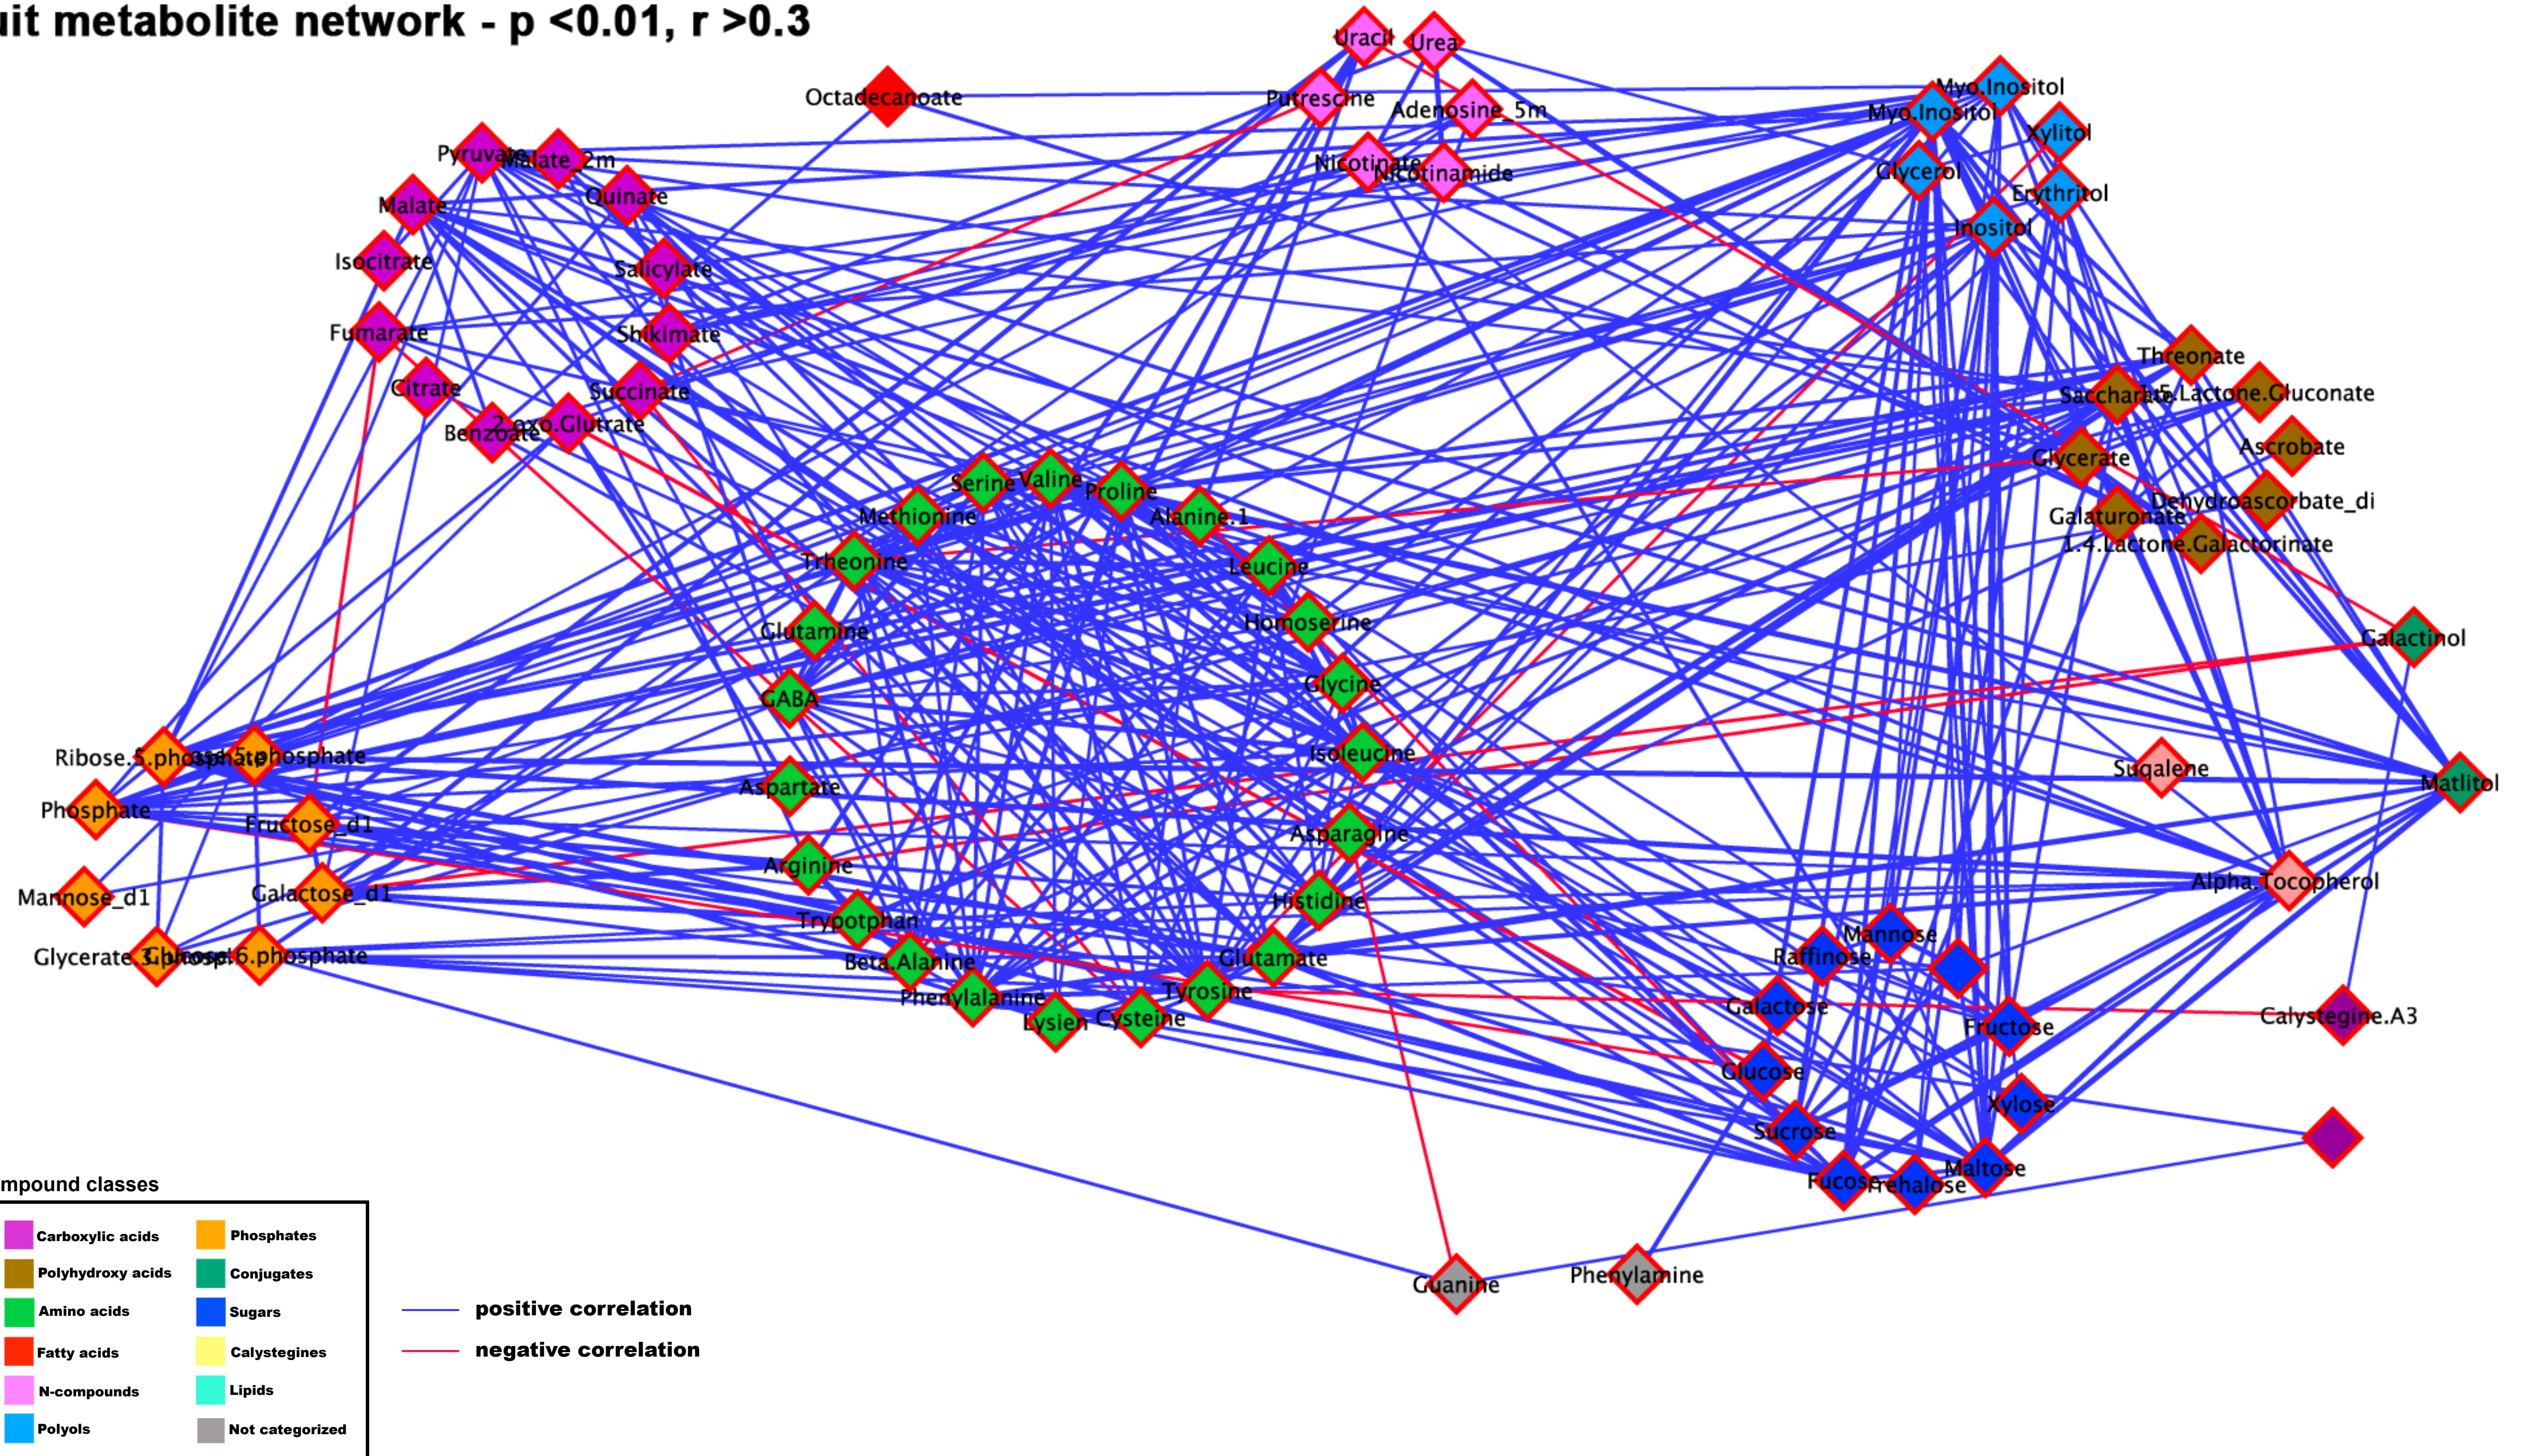

Supplement: S6 (10.1371/journal.pgen.1002612.s006) [file journal.pgen.1002612.s006]
