# Supplementary material for: Metabolic Profiling of a Mapping Population Exposes New Insights in the Regulation of Seed Metabolism and Seed, Fruit, and Plant Relations
Source: PLOS journal article supplement (doi:10.1371/journal.pgen.1002612), 2012-03-29

Seed harvests 2004-2005 conserved correlations - compound class-connectivity view  
 $r \geq 0.3$ ,  $p \leq 0.01$

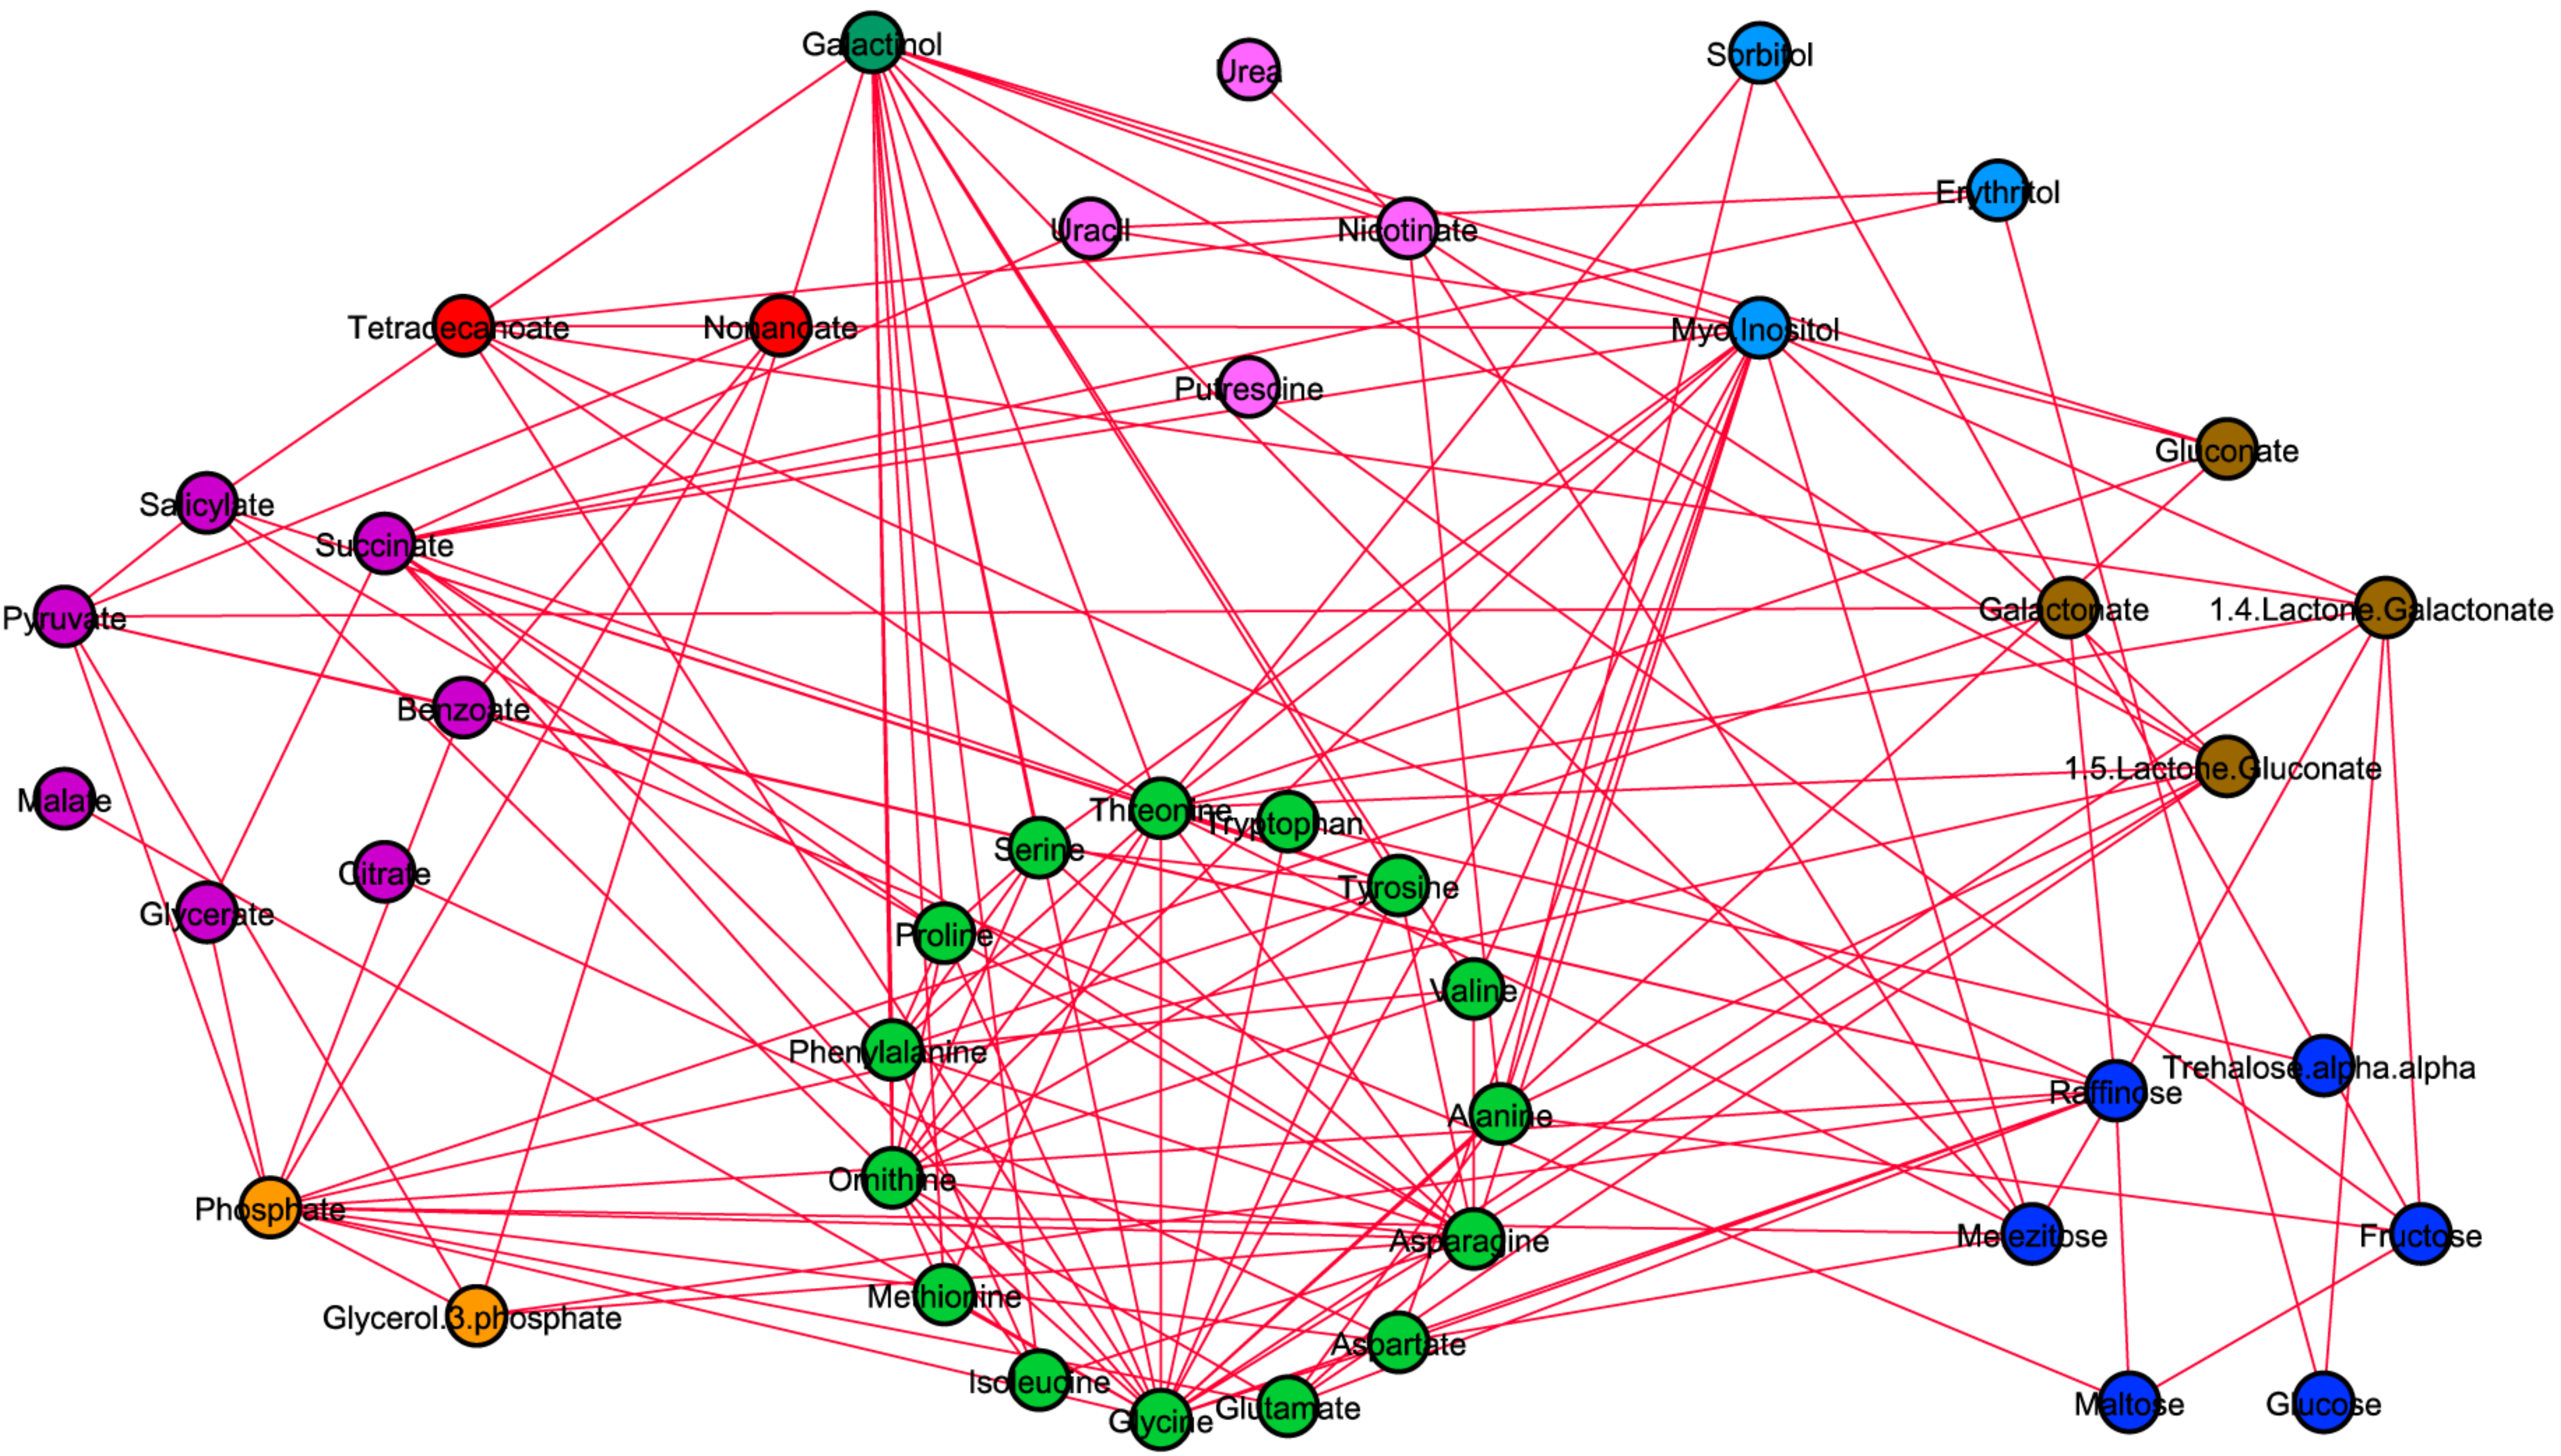

Seed harvests 2004-2005 conserved correlations - cluster view  
 $r \geq 0.3$ ,  $p \leq 0.01$

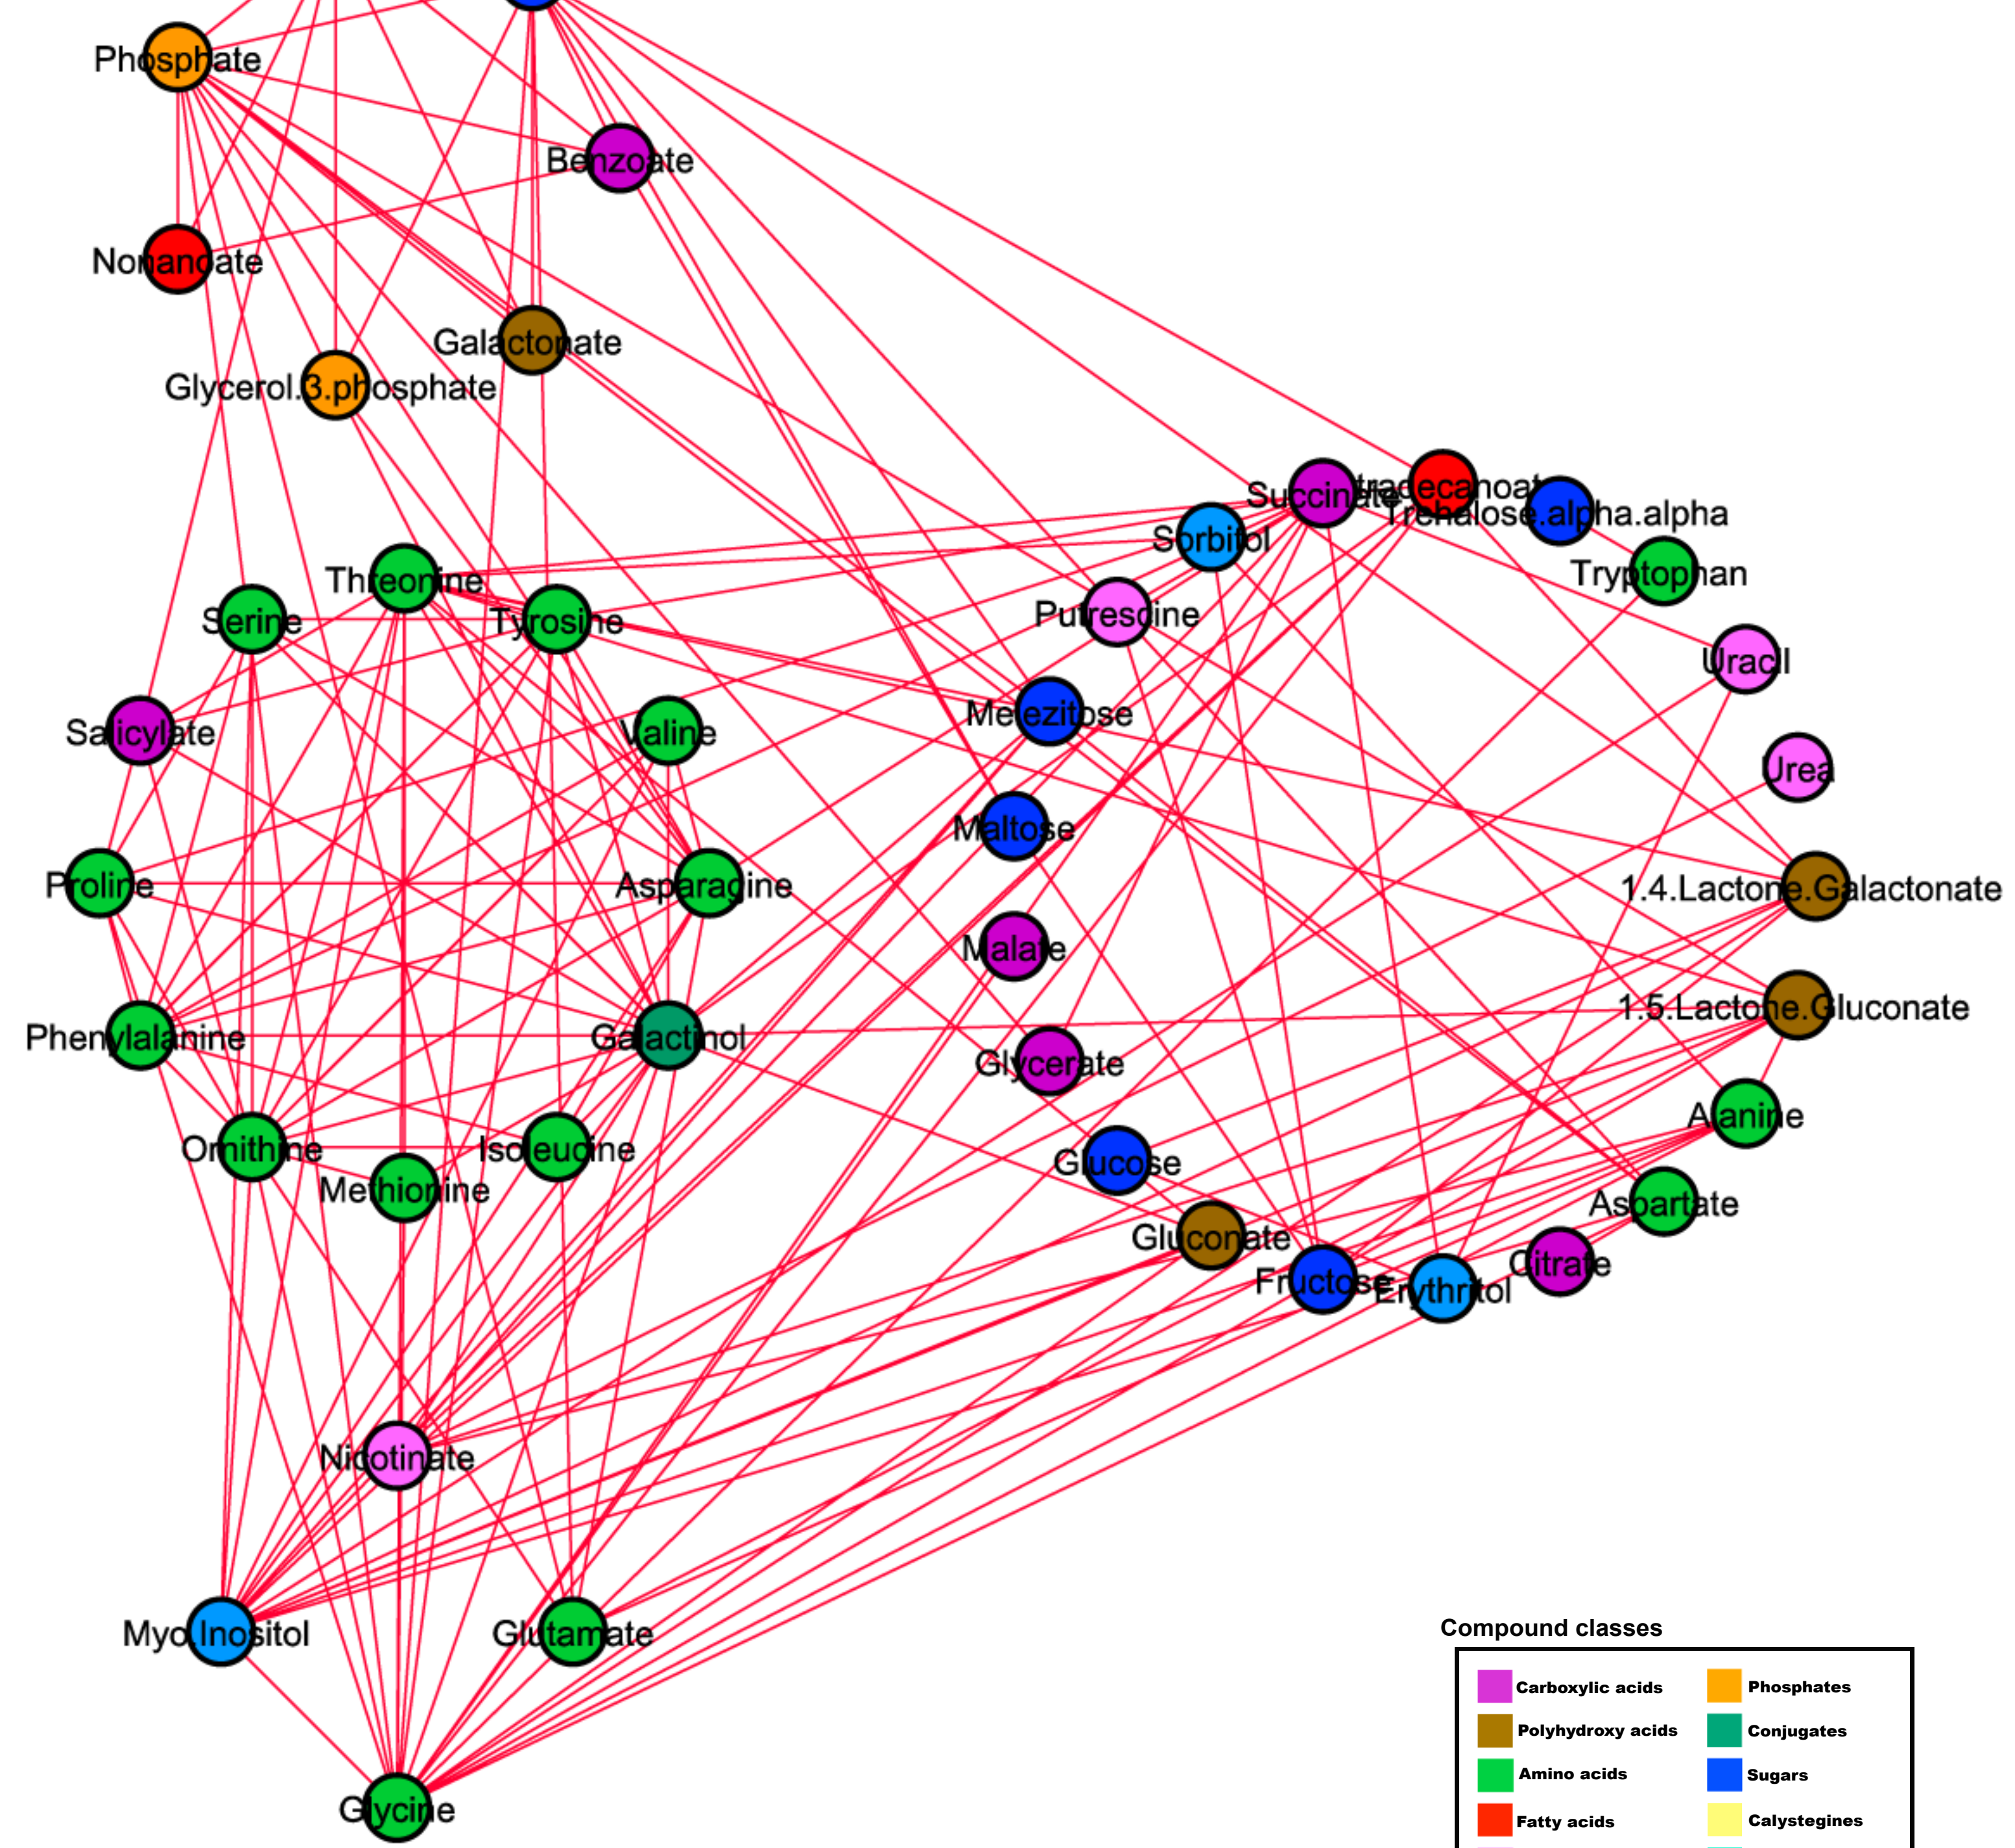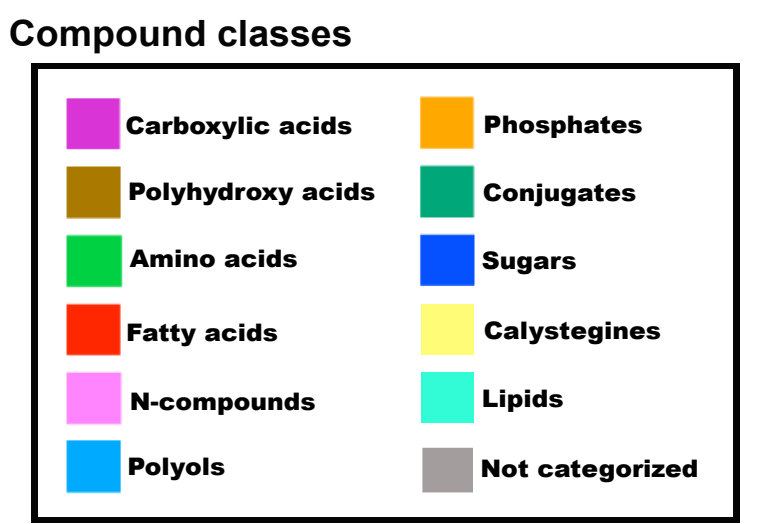

Supplement: S9 (10.1371/journal.pgen.1002612.s009) [file journal.pgen.1002612.s009]
