# Supplementary material for: Metabolic Profiling of a Mapping Population Exposes New Insights in the Regulation of Seed Metabolism and Seed, Fruit, and Plant Relations
Source: PLOS journal article supplement (doi:10.1371/journal.pgen.1002612), 2012-03-29
Supplement: S18 (10.1371/journal.pgen.1002612.s018) [file journal.pgen.1002612.s018]

Conserved correlation Table S9. Conserved correlations across seasons and tissues.

| Tissue - Season                                             | n of correlations | n of conserved correlations | % of conserved correlations | % of conserved correlations in accordance to network 1 | % of conserved correlations in accordance to network 2 |
|-------------------------------------------------------------|-------------------|-----------------------------|-----------------------------|--------------------------------------------------------|--------------------------------------------------------|
| Seed I                                                      | 689               | -                           | -                           | -                                                      | -                                                      |
| Seed II                                                     | 366               | -                           | -                           | -                                                      | -                                                      |
| Fruit I                                                     | 383               | -                           | -                           | -                                                      | -                                                      |
| Fruit III                                                   | 434               | -                           | -                           | -                                                      | -                                                      |
| Fruit IV                                                    | 741               | -                           | -                           | -                                                      | -                                                      |
| Seed I $\cup$ II                                            | 899               | 146                         | 16.2                        | 21.1                                                   | 40.0                                                   |
| Fruit I $\cup$ III                                          | 787               | 92                          | 11.7                        | 21.2                                                   | 24                                                     |
| Fruit I $\cup$ IV                                           | 1050              | 101                         | 9.6                         | 13.6                                                   | 26.4                                                   |
| Fruit III $\cup$ IV                                         | 1555              | 231                         | 14.9                        | 53.3                                                   | 31.1                                                   |
| (Fruit I $\cup$ Seed I) $\cap$ (Fruit I $\cup$ Seed II)     | 257               | 0                           | 0.0                         | 0.0                                                    | 0.0                                                    |
| (Fruit III $\cup$ Seed I) $\cap$ (Fruit III $\cup$ Seed II) | 474               | 1                           | 0.0                         | 0.0                                                    | 0.0                                                    |
| (Fruit IV $\cup$ Seed I) $\cap$ (Fruit IV $\cup$ Seed II)   | 744               | 0                           | 0.0                         | 0.0                                                    | 0.0                                                    |

Conserved correlations across seasons within the same tissue. Also conserved correlations of combinatorial fruit-seed networks - different seasons compared. To compare networks, datasets need to be synchronized for metabolites, which leads to loss of correlations. Roman capitals refer to harvest seasons.
