# Supplementary material for: Metabolic Profiling of a Mapping Population Exposes New Insights in the Regulation of Seed Metabolism and Seed, Fruit, and Plant Relations
Source: PLoS Genet. 2012 Mar 29;8(3):e1002612. doi: 10.1371/journal.pgen.1002612 (PMC3315483; doi:10.1371/journal.pgen.1002612)
Supplement: Table S2 — Candidate gene At5g10920 and its correlated genes associated with glycolysis on IL 4-3. Candidate gene At5g10920 as identified on IL 4-3 putatively associated with glycolysis and correlated genes as generated by SeedNet available on http://vseednet.nottingham.ac.uk. The candidate gene is involved in Arg biosynthesis. The correlated genes are supplied with the Pearson correlation coefficient values. Correlated genes of relevance to glycolysis are highlighted in grey. Localization of gene candidates was achieved by utilizing data as analyzed on dry IL seeds of harvest seasons I and II in Akko, Israel. (PDF) [file pgen.1002612.s011.pdf]

SeedNet Correlation Table S2. Candidate gene *At5g10920* and its correlated genes associated with Glycolysis on IL 4-3.

| AGI                    | Links               | Annotation                                                                                                                                 | SAM NG/G | ABA Regulation | GA Regulation | Correlation |
|------------------------|---------------------|--------------------------------------------------------------------------------------------------------------------------------------------|----------|----------------|---------------|-------------|
| At1g56050              | eFP TAIR Neighbours | GTP-binding protein-related                                                                                                                | SAM G    |                |               | 0.87        |
| At1g17200              | eFP TAIR Neighbours | integral membrane family protein                                                                                                           | SAM G    |                |               | 0.87        |
| At5g24300              | eFP TAIR Neighbours | ATSS1/SSI (STARCH SYNTHASE I); transferase, transferring glycosyl groups                                                                   | SAM G    |                |               | 0.87        |
| At4g33680              | eFP TAIR Neighbours | AGD2 (ABERRANT GROWTH AND DEATH 2); transaminase                                                                                           | SAM G    |                |               | 0.87        |
| At5g26710              | eFP TAIR Neighbours | glutamate-tRNA ligase, putative / glutamyl-tRNA synthetase, putative / GluRS, putative                                                     | SAM G    |                |               | 0.87        |
| At3g57610              | eFP TAIR Neighbours | ATPURA; adenylosuccinate synthase                                                                                                          | SAM G    |                |               | 0.87        |
| At5g20950              | eFP TAIR Neighbours | glycosyl hydrolase family 3 protein                                                                                                        |          | ABA Up         |               | 0.87        |
| At4g38210              | eFP TAIR Neighbours | ATEXPA20 (ARABIDOPSIS THALIANA EXPANSIN A20)                                                                                               | SAM G    |                |               | 0.86        |
| At3g25860              | eFP TAIR Neighbours | LTA2 (PLASTID E2 SUBUNIT OF PYRUVATE DECARBOXYLASE); dihydrolipoyllysine-residue acetyltransferase                                         | SAM G    |                |               | 0.86        |
| At5g63810              | eFP TAIR Neighbours | BGAL10 (beta-galactosidase 10); beta-galactosidase                                                                                         | SAM G    |                |               | 0.86        |
| At3g16480              | eFP TAIR Neighbours | MPPALPHA (mitochondrial processing peptidase alpha subunit); metalloendopeptidase                                                          | SAM G    |                |               | 0.86        |
| At5g67510              | eFP TAIR Neighbours | 60S ribosomal protein L26 (RPL26B)                                                                                                         |          |                |               | 0.86        |
| At3g25040              | eFP TAIR Neighbours | ER lumen protein retaining receptor, putative / HDEL receptor, putative                                                                    | SAM G    |                |               | 0.86        |
| At3g14310              | eFP TAIR Neighbours | ATPME3 (Arabidopsis thaliana pectin methylesterase 3)                                                                                      | SAM G    |                |               | 0.85        |
| At1g31860              | eFP TAIR Neighbours | AT-IE (Arabidopsis thaliana bifunctional HisI-HisE protein)                                                                                |          |                |               | 0.85        |
| At1g68560              | eFP TAIR Neighbours | ATXYL1/XYL1 (ALPHA-XYLOSIDASE 1); alpha-N-arabinofuranosidase/ hydrolase, hydrolyzing O-glycosyl compounds / xylan 1,4-beta-xylosidase     |          | ABA Up         |               | 0.85        |
| At2g47930              | eFP TAIR Neighbours | AGP26/ATAGP26 (ARABINOGLACTAN PROTEINS 26)                                                                                                 | SAM G    |                |               | 0.85        |
| At4g30800              | eFP TAIR Neighbours | 40S ribosomal protein S11 (RPS11B)                                                                                                         | SAM G    |                |               | 0.85        |
| At1g60160              | eFP TAIR Neighbours | potassium transporter family protein                                                                                                       | SAM G    |                |               | 0.85        |
| At1g71100              | eFP TAIR Neighbours | RSW10 (RADIAL SWELLING 10); ribose-5-phosphate isomerase                                                                                   |          |                |               | 0.85        |
| At1g13270              | eFP TAIR Neighbours | MAP1C (METHIONINE AMINOPEPTIDASE 1B); metalloexopeptidase                                                                                  | SAM G    | ABA Down       |               | 0.85        |
| At2g44040<br>At3g59890 | eFP TAIR Neighbours | [AT2G44040, dihydrodipicolinate reductase family protein];[AT3G59890, dihydrodipicolinate reductase family protein]                        |          |                |               | 0.85        |
| At5g48300              | eFP TAIR Neighbours | ADG1 (ADP GLUCOSE PYROPHOSPHORYLASE SMALL SUBUNIT 1); glucose-1-phosphate adenylyltransferase                                              | SAM G    |                |               | 0.85        |
| At2g37640              | eFP TAIR Neighbours | ATEXPA3 (ARABIDOPSIS THALIANA EXPANSIN A3)                                                                                                 |          |                | GA Up         | 0.85        |
| At3g18130              | eFP TAIR Neighbours | guanine nucleotide-binding family protein / activated protein kinase C receptor (RACK1)                                                    |          |                |               | 0.85        |
| At2g20420              | eFP TAIR Neighbours | succinyl-CoA ligase (GDP-forming) beta-chain, mitochondrial, putative / succinyl-CoA synthetase, beta chain, putative / SCS-beta, putative |          |                |               | 0.85        |
| At3g49680              | eFP TAIR Neighbours | ATBCAT-3/BCAT3 (BRANCHED-CHAIN AMINOTRANSFERASE 3); branched-chain-amino-acid transaminase/ catalytic                                      | SAM G    | ABA Down       |               | 0.85        |
| At1g14810              | eFP TAIR Neighbours | semialdehyde dehydrogenase family protein                                                                                                  | SAM G    |                |               | 0.85        |
| At5g50370              | eFP TAIR Neighbours | adenylate kinase, putative                                                                                                                 |          |                |               | 0.85        |
| At1g27450              | eFP TAIR Neighbours | APT1; adenine phosphoribosyltransferase                                                                                                    |          |                |               | 0.85        |
| At1g17650              | eFP TAIR Neighbours | phosphogluconate dehydrogenase (decarboxylating)                                                                                           | SAM G    |                |               | 0.84        |
| At1g68590              | eFP TAIR Neighbours | plastid-specific 30S ribosomal protein 3, putative / PSRP-3, putative                                                                      |          |                |               | 0.84        |
| At2g43330              | eFP TAIR Neighbours | ATINT1 (INOSITOL TRANSPORTER 1); carbohydrate transmembrane transporter/ sugar:hydrogen ion symporter                                      | SAM G    |                |               | 0.84        |
| At1g63660              | eFP TAIR Neighbours | GMP synthase (glutamine-hydrolyzing), putative / glutamine amidotransferase, putative                                                      |          |                |               | 0.84        |
| At1g32990              | eFP TAIR Neighbours | PRPL11 (PLASTID RIBOSOMAL PROTEIN L11); structural constituent of ribosome                                                                 | SAM G    |                |               | 0.84        |
| At1g48630              | eFP TAIR Neighbours | guanine nucleotide-binding family protein / activated protein kinase C receptor, putative / RACK, putative                                 |          |                |               | 0.84        |
| At4g35850              | eFP TAIR Neighbours | pentatricopeptide (PPR) repeat-containing protein                                                                                          | SAM G    |                |               | 0.84        |

|                        |                     |                                                                                                                                                                                                                                                                                                          |       |          |       |      |
|------------------------|---------------------|----------------------------------------------------------------------------------------------------------------------------------------------------------------------------------------------------------------------------------------------------------------------------------------------------------|-------|----------|-------|------|
| At1g27970              | eFP TAIR Neighbours | NTF2B (NUCLEAR TRANSPORT FACTOR 2B); Ran GTPase binding / protein transporter                                                                                                                                                                                                                            | SAM G |          |       | 0.84 |
| At5g49810              | eFP TAIR Neighbours | MMT (methionine S-methyltransferase); S-adenosylmethionine-dependent methyltransferase                                                                                                                                                                                                                   | SAM G | ABA Up   |       | 0.84 |
| At4g39880              | eFP TAIR Neighbours | ribosomal protein L23 family protein                                                                                                                                                                                                                                                                     | SAM G |          |       | 0.84 |
| At5g63980              | eFP TAIR Neighbours | SAL1 (FIERY1); 3'(2'),5'-bisphosphate nucleotidase/ inositol or phosphatidylinositol phosphatase                                                                                                                                                                                                         | SAM G |          |       | 0.84 |
| At3g14220              | eFP TAIR Neighbours | GDSL-motif lipase/hydrolase family protein                                                                                                                                                                                                                                                               |       |          |       | 0.84 |
| At3g44590              | eFP TAIR Neighbours | 60S acidic ribosomal protein P2 (RPP2D)                                                                                                                                                                                                                                                                  |       | ABA Down |       | 0.84 |
| At2g40820              | eFP TAIR Neighbours | 3'-5'-exoribonuclease/ RNA binding                                                                                                                                                                                                                                                                       | SAM G |          |       | 0.83 |
| At1g13730              | eFP TAIR Neighbours | nuclear transport factor 2 (NTF2) family protein / RNA recognition motif (RRM)-containing protein                                                                                                                                                                                                        | SAM G |          |       | 0.83 |
| At3g46940              | eFP TAIR Neighbours | deoxyuridine 5'-triphosphate nucleotidohydrolase family                                                                                                                                                                                                                                                  |       |          |       | 0.83 |
| At5g11880<br>At3g14390 | eFP TAIR Neighbours | [AT5G11880, diaminopimelate decarboxylase, putative / DAP carboxylase, putative];[AT3G14390, diaminopimelate decarboxylase, putative / DAP carboxylase, putative]                                                                                                                                        |       |          |       | 0.83 |
| At5g14040              | eFP TAIR Neighbours | mitochondrial phosphate transporter                                                                                                                                                                                                                                                                      | SAM G |          |       | 0.83 |
| At4g28360<br>At1g52370 | eFP TAIR Neighbours | [AT4G28360, ribosomal protein L22 family protein];[AT1G52370, ribosomal protein L22 family protein]                                                                                                                                                                                                      |       |          |       | 0.83 |
| At2g47590              | eFP TAIR Neighbours | PHR2 (PHOTOLYASE/BLUE-LIGHT RECEPTOR 2)                                                                                                                                                                                                                                                                  | SAM G |          |       | 0.82 |
| At1g12800              | eFP TAIR Neighbours | S1 RNA-binding domain-containing protein                                                                                                                                                                                                                                                                 | SAM G | ABA Down |       | 0.82 |
| At1g69530              | eFP TAIR Neighbours | ATEXPA1 (ARABIDOPSIS THALIANA EXPANSIN A1)                                                                                                                                                                                                                                                               |       | ABA Up   | GA Up | 0.82 |
| At1g44900              | eFP TAIR Neighbours | ATP binding / DNA binding / DNA-dependent ATPase                                                                                                                                                                                                                                                         | SAM G |          | GA Up | 0.82 |
| At1g34430              | eFP TAIR Neighbours | EMB3003 (EMBRYO DEFECTIVE 3003); dihydrolipoyllysine-residue acetyltransferase                                                                                                                                                                                                                           |       |          |       | 0.82 |
| At2g29980              | eFP TAIR Neighbours | FAD3 (FATTY ACID DESATURASE 3); omega-3 fatty acid desaturase                                                                                                                                                                                                                                            |       |          |       | 0.82 |
| At4g14960              | eFP TAIR Neighbours | TUA6 (tubulin alpha-6 chain)                                                                                                                                                                                                                                                                             |       | ABA Down |       | 0.82 |
| At3g56490              | eFP TAIR Neighbours | zinc-binding protein, putative / protein kinase C inhibitor, putative                                                                                                                                                                                                                                    |       |          |       | 0.82 |
| At3g16780              | eFP TAIR Neighbours | 60S ribosomal protein L19 (RPL19B)                                                                                                                                                                                                                                                                       |       |          |       | 0.82 |
| At5g22440              | eFP TAIR Neighbours | 60S ribosomal protein L10A (RPL10aC)                                                                                                                                                                                                                                                                     |       |          |       | 0.82 |
| At2g20450              | eFP TAIR Neighbours | 60S ribosomal protein L14 (RPL14A)                                                                                                                                                                                                                                                                       |       |          |       | 0.82 |
| At5g48360              | eFP TAIR Neighbours | formin homology 2 domain-containing protein / FH2 domain-containing protein                                                                                                                                                                                                                              | SAM G |          |       | 0.81 |
| At1g32200              | eFP TAIR Neighbours | ATS1 (ACYLTRANSFERASE 1)                                                                                                                                                                                                                                                                                 | SAM G | ABA Down |       | 0.81 |
| At5g60890              | eFP TAIR Neighbours | ATMYB34/ATR1/MYB34 (ALTERED TRYPTOPHAN REGULATION, MYB DOMAIN PROTEIN 34); DNA binding / kinase/ transcription activator/ transcription factor                                                                                                                                                           | SAM G |          | GA Up | 0.81 |
| At1g31180<br>At5g14200 | eFP TAIR Neighbours | [AT1G31180, 3-isopropylmalate dehydrogenase, chloroplast, putative];[AT5G14200, 3-isopropylmalate dehydrogenase, chloroplast, putative]                                                                                                                                                                  |       |          |       | 0.81 |
| At3g15680              | eFP TAIR Neighbours | zinc finger (Ran-binding) family protein                                                                                                                                                                                                                                                                 | SAM G |          |       | 0.81 |
| At4g30620              | eFP TAIR Neighbours | similar to unknown protein [Arabidopsis thaliana] (TAIR:AT2G24020.1); similar to unknown [Picea sitchensis] (GB:ABK26000.1); similar to Os02g0180200 [Oryza sativa (japonica cultivar-group)] (GB:NP_001046090.1); contains InterPro domain Conserved hypothetical protein CHP00103 (InterPro:IPR004401) | SAM G |          |       | 0.81 |
| At1g15810              | eFP TAIR Neighbours | ribosomal protein S15 family protein                                                                                                                                                                                                                                                                     | SAM G | ABA Up   |       | 0.81 |
| At4g26760              | eFP TAIR Neighbours | microtubule associated protein (MAP65/ASE1) family protein                                                                                                                                                                                                                                               | SAM G |          |       | 0.81 |
| At1g76790              | eFP TAIR Neighbours | O-methyltransferase family 2 protein                                                                                                                                                                                                                                                                     | SAM G |          |       | 0.81 |
| At2g46170              | eFP TAIR Neighbours | reticulon family protein (RTNLB5)                                                                                                                                                                                                                                                                        | SAM G | ABA Down |       | 0.81 |
| At2g33255              | eFP TAIR Neighbours | hydrolase                                                                                                                                                                                                                                                                                                | SAM G |          |       | 0.81 |
| At2g16430              | eFP TAIR Neighbours | ATPAP10/PAP10; protein serine/threonine phosphatase                                                                                                                                                                                                                                                      |       |          |       | 0.81 |
| At1g01300              | eFP TAIR Neighbours | aspartyl protease family protein                                                                                                                                                                                                                                                                         | SAM G | ABA Up   |       | 0.81 |
| At1g80530              | eFP TAIR Neighbours | nodulin family protein                                                                                                                                                                                                                                                                                   | SAM G |          |       | 0.81 |
| At5g51550              | eFP TAIR Neighbours | phosphate-responsive 1 family protein                                                                                                                                                                                                                                                                    | SAM G |          |       | 0.81 |
| At3g10610              | eFP TAIR Neighbours | 40S ribosomal protein S17 (RPS17C)                                                                                                                                                                                                                                                                       |       |          |       | 0.81 |

|           |                     |                                                                                                                                                                                                                                                     |       |          |       |      |
|-----------|---------------------|-----------------------------------------------------------------------------------------------------------------------------------------------------------------------------------------------------------------------------------------------------|-------|----------|-------|------|
| At3g49080 | eFP TAIR Neighbours | ribosomal protein S9 family protein                                                                                                                                                                                                                 | SAM G |          |       | 0.81 |
| At3g27740 | eFP TAIR Neighbours | CARA (CARBAMOYL PHOSPHATE SYNTHETASE A); carbamoyl-phosphate synthase (glutamine-hydrolyzing)                                                                                                                                                       | SAM G |          |       | 0.81 |
| At5g08260 | eFP TAIR Neighbours | SCPL35 (serine carboxypeptidase-like 35); serine carboxypeptidase                                                                                                                                                                                   |       |          |       | 0.81 |
| At1g26910 | eFP TAIR Neighbours | 60S ribosomal protein L10 (RPL10B)                                                                                                                                                                                                                  | SAM G |          |       | 0.81 |
| At5g08160 | eFP TAIR Neighbours | ATPK3 (Arabidopsis thaliana serine/threonine protein kinase 3); kinase                                                                                                                                                                              | SAM G |          |       | 0.81 |
| At4g30810 | eFP TAIR Neighbours | SCPL29 (serine carboxypeptidase-like 29); serine carboxypeptidase                                                                                                                                                                                   |       |          |       | 0.81 |
| At5g57490 | eFP TAIR Neighbours | porin, putative                                                                                                                                                                                                                                     | SAM G |          |       | 0.81 |
| At5g58250 | eFP TAIR Neighbours | similar to hypothetical protein [Vitis vinifera] (GB:CAN75840.1); contains domain PD020337 (PD020337)                                                                                                                                               | SAM G |          |       | 0.81 |
| At1g76160 | eFP TAIR Neighbours | SKS5 (SKU5 Similar 5); copper ion binding / oxidoreductase                                                                                                                                                                                          |       | ABA Down |       | 0.8  |
| At2g20140 | eFP TAIR Neighbours | 26S protease regulatory complex subunit 4, putative                                                                                                                                                                                                 |       |          |       | 0.8  |
| At3g05910 | eFP TAIR Neighbours | pectinacetylsterase, putative                                                                                                                                                                                                                       | SAM G |          |       | 0.8  |
| At3g22780 | eFP TAIR Neighbours | TSO1 (CHINESE FOR 'UGLY'); transcription factor                                                                                                                                                                                                     | SAM G | ABA Up   |       | 0.8  |
| At5g14750 | eFP TAIR Neighbours | ATMYB66/WER/WER1 (WEREWOLF 1); DNA binding / protein binding / transcription factor/ transcription regulator                                                                                                                                        |       |          | GA Up | 0.8  |
| At1g78060 | eFP TAIR Neighbours | glycosyl hydrolase family 3 protein                                                                                                                                                                                                                 |       |          |       | 0.8  |
| At1g21880 | eFP TAIR Neighbours | LYM1 (LYSM DOMAIN GPI-ANCHORED PROTEIN 1 PRECURSOR)                                                                                                                                                                                                 | SAM G |          |       | 0.8  |
| At5g57440 | eFP TAIR Neighbours | GS1 (GLYCEROL-3-PHOSPHATASE 2); hydrolase                                                                                                                                                                                                           |       | ABA Down |       | 0.8  |
| At4g32400 | eFP TAIR Neighbours | SHS1 (SODIUM HYPERSENSITIVE 1); binding / transporter                                                                                                                                                                                               | SAM G |          |       | 0.8  |
| At2g33330 | eFP TAIR Neighbours | 33 kDa secretory protein-related                                                                                                                                                                                                                    | SAM G |          |       | 0.8  |
| At1g33240 | eFP TAIR Neighbours | AT-GTL1 (Arabidopsis thaliana GT2-like 1); transcription factor                                                                                                                                                                                     | SAM G | ABA Up   |       | 0.8  |
| At1g74510 | eFP TAIR Neighbours | kelch repeat-containing F-box family protein                                                                                                                                                                                                        | SAM G |          |       | 0.8  |
| At2g25840 | eFP TAIR Neighbours | OVA4 (OVULE ABORTION 4); ATP binding / aminoacyl-tRNA ligase                                                                                                                                                                                        | SAM G | ABA Down |       | 0.8  |
| At5g62680 | eFP TAIR Neighbours | proton-dependent oligopeptide transport (POT) family protein                                                                                                                                                                                        | SAM G |          |       | 0.8  |
| At1g15000 | eFP TAIR Neighbours | SCPL50 (serine carboxypeptidase-like 50); serine carboxypeptidase                                                                                                                                                                                   | SAM G |          |       | 0.8  |
| At1g29070 | eFP TAIR Neighbours | ribosomal protein L34 family protein                                                                                                                                                                                                                | SAM G | ABA Down |       | 0.8  |
| At1g60770 | eFP TAIR Neighbours | pentatricopeptide (PPR) repeat-containing protein                                                                                                                                                                                                   |       |          |       | 0.8  |
| At4g12650 | eFP TAIR Neighbours | endomembrane protein 70, putative                                                                                                                                                                                                                   | SAM G |          |       | 0.8  |
| At4g21150 | eFP TAIR Neighbours | ribophorin II (RPN2) family protein                                                                                                                                                                                                                 | SAM G |          |       | 0.8  |
| At4g16390 | eFP TAIR Neighbours | chloroplastic RNA-binding protein P67, putative                                                                                                                                                                                                     |       | ABA Down |       | 0.8  |
| At1g28395 | eFP TAIR Neighbours | similar to unknown protein [Arabidopsis thaliana] (TAIR:AT2G33847.2); similar to unnamed protein product [Vitis vinifera] (GB:CAO39903.1)                                                                                                           |       |          |       | 0.8  |
| At1g26770 | eFP TAIR Neighbours | ATEXPA10 (ARABIDOPSIS THALIANA EXPANSIN A10)                                                                                                                                                                                                        |       | ABA Up   | GA Up | 0.8  |
| At3g48730 | eFP TAIR Neighbours | GSA2 (GLUTAMATE-1-SEMIALDEHYDE 2,1-AMINOMUTASE 2); glutamate-1-semialdehyde 2,1-aminomutase                                                                                                                                                         | SAM G | ABA Down |       | 0.8  |
| At2g27840 | eFP TAIR Neighbours | HDT4 (histone deacetylase 13)                                                                                                                                                                                                                       | SAM G | ABA Down |       | 0.8  |
| At2g37790 | eFP TAIR Neighbours | aldo/keto reductase family protein                                                                                                                                                                                                                  |       |          |       | 0.79 |
| At3g53800 | eFP TAIR Neighbours | armadillo/beta-catenin repeat family protein                                                                                                                                                                                                        | SAM G |          |       | 0.79 |
| At2g14890 | eFP TAIR Neighbours | AGP9 (ARABINOGALACTAN PROTEIN 9)                                                                                                                                                                                                                    |       |          |       | 0.79 |
| At1g44835 | eFP TAIR Neighbours | YbaK/prolyl-tRNA synthetase family protein                                                                                                                                                                                                          |       |          |       | 0.79 |
| At2g46420 | eFP TAIR Neighbours | similar to unknown protein [Arabidopsis thaliana] (TAIR:AT3G61700.1); similar to unnamed protein product [Vitis vinifera] (GB:CAO39750.1); contains InterPro domain Conserved hypothetical protein CHP01589, plant (InterPro:IPR006476)             | SAM G |          |       | 0.79 |
| At3g61770 | eFP TAIR Neighbours | similar to unknown protein [Arabidopsis thaliana] (TAIR:AT1G67600.1); similar to unnamed protein product [Vitis vinifera] (GB:CAO14376.1); contains InterPro domain Acid phosphatase/vanadium-dependent haloperoxidase related (InterPro:IPR003832) | SAM G |          |       | 0.79 |

|           |                     |                                                                                                                                                                                                                                                                                                                                                                                                                                      |       |          |       |      |
|-----------|---------------------|--------------------------------------------------------------------------------------------------------------------------------------------------------------------------------------------------------------------------------------------------------------------------------------------------------------------------------------------------------------------------------------------------------------------------------------|-------|----------|-------|------|
| At5g67070 | eFP TAIR Neighbours | RALFL34 (RALF-LIKE 34)                                                                                                                                                                                                                                                                                                                                                                                                               |       |          |       | 0.79 |
| At3g14790 | eFP TAIR Neighbours | RHM3 (RHAMNOSE BIOSYNTHESIS 3); catalytic                                                                                                                                                                                                                                                                                                                                                                                            | SAM G |          |       | 0.79 |
| At5g25490 | eFP TAIR Neighbours | zinc finger (Ran-binding) family protein                                                                                                                                                                                                                                                                                                                                                                                             | SAM G |          |       | 0.79 |
| At3g14240 | eFP TAIR Neighbours | subtilase family protein                                                                                                                                                                                                                                                                                                                                                                                                             | SAM G | ABA Up   |       | 0.79 |
| At3g57560 | eFP TAIR Neighbours | aspartate/glutamate/uridylylate kinase family protein                                                                                                                                                                                                                                                                                                                                                                                | SAM G |          |       | 0.79 |
| At5g19750 | eFP TAIR Neighbours | peroxisomal membrane 22 kDa family protein                                                                                                                                                                                                                                                                                                                                                                                           | SAM G | ABA Down |       | 0.79 |
| At5g16870 | eFP TAIR Neighbours | similar to unknown protein [Arabidopsis thaliana] (TAIR:AT3G03010.1); similar to unknown protein [Arabidopsis thaliana] (TAIR:AT3G03010.2); similar to hypothetical protein [Vitis vinifera] (GB:CAN83813.1); contains InterPro domain Peptidyl-tRNA hydrolase, PTH2 (InterPro:IPR002833)                                                                                                                                            |       |          |       | 0.79 |
| At1g47670 | eFP TAIR Neighbours | amino acid transporter family protein                                                                                                                                                                                                                                                                                                                                                                                                | SAM G | ABA Up   |       | 0.79 |
| At5g27820 | eFP TAIR Neighbours | ribosomal protein L18 family protein                                                                                                                                                                                                                                                                                                                                                                                                 |       | ABA Down |       | 0.79 |
| At2g19670 | eFP TAIR Neighbours | protein arginine N-methyltransferase, putative                                                                                                                                                                                                                                                                                                                                                                                       |       |          |       | 0.79 |
| At5g14660 | eFP TAIR Neighbours | PDF1B (PEPTIDE DEFORMYLASE 1B); peptide deformylase                                                                                                                                                                                                                                                                                                                                                                                  |       |          |       | 0.79 |
| At5g57180 | eFP TAIR Neighbours | CIA2 (CHLOROPLAST IMPORT APPARATUS 2)                                                                                                                                                                                                                                                                                                                                                                                                | SAM G | ABA Down |       | 0.79 |
| At1g70280 | eFP TAIR Neighbours | NHL repeat-containing protein                                                                                                                                                                                                                                                                                                                                                                                                        |       |          |       | 0.79 |
| At4g22250 | eFP TAIR Neighbours | zinc finger (C3HC4-type RING finger) family protein                                                                                                                                                                                                                                                                                                                                                                                  |       |          |       | 0.79 |
| At3g27240 | eFP TAIR Neighbours | cytochrome c1, putative                                                                                                                                                                                                                                                                                                                                                                                                              | SAM G |          |       | 0.79 |
| At3g57490 | eFP TAIR Neighbours | 40S ribosomal protein S2 (RPS2D)                                                                                                                                                                                                                                                                                                                                                                                                     |       |          |       | 0.79 |
| At5g63400 | eFP TAIR Neighbours | ADK1 (ADENYLATE KINASE 1); adenylate kinase                                                                                                                                                                                                                                                                                                                                                                                          |       |          |       | 0.79 |
| At4g13170 | eFP TAIR Neighbours | 60S ribosomal protein L13A (RPL13aC)                                                                                                                                                                                                                                                                                                                                                                                                 |       | ABA Down |       | 0.79 |
| At4g39280 | eFP TAIR Neighbours | phenylalanyl-tRNA synthetase, putative / phenylalanine--tRNA ligase, putative                                                                                                                                                                                                                                                                                                                                                        | SAM G |          |       | 0.79 |
| At3g55400 | eFP TAIR Neighbours | OVA1 (OVULE ABORTION 1); ATP binding / aminoacyl-tRNA ligase                                                                                                                                                                                                                                                                                                                                                                         |       |          |       | 0.79 |
| At1g51730 | eFP TAIR Neighbours | RWD domain-containing protein                                                                                                                                                                                                                                                                                                                                                                                                        |       |          |       | 0.79 |
| At5g67220 | eFP TAIR Neighbours | nitrogen regulation family protein                                                                                                                                                                                                                                                                                                                                                                                                   |       |          |       | 0.79 |
| At4g24830 | eFP TAIR Neighbours | arginosuccinate synthase family                                                                                                                                                                                                                                                                                                                                                                                                      |       |          |       | 0.79 |
| At1g10522 | eFP TAIR Neighbours | similar to unnamed protein product [Vitis vinifera] (GB:CAO40945.1)                                                                                                                                                                                                                                                                                                                                                                  | SAM G |          |       | 0.79 |
| At4g34120 | eFP TAIR Neighbours | LEJ1 (LOSS OF THE TIMING OF ET AND JA BIOSYNTHESIS 1)                                                                                                                                                                                                                                                                                                                                                                                | SAM G | ABA Down |       | 0.79 |
| At3g62120 | eFP TAIR Neighbours | tRNA synthetase class II (G, H, P and S) family protein                                                                                                                                                                                                                                                                                                                                                                              | SAM G |          |       | 0.79 |
| At1g16870 | eFP TAIR Neighbours | mitochondrial 28S ribosomal protein S29-related                                                                                                                                                                                                                                                                                                                                                                                      |       |          |       | 0.79 |
| At1g20950 | eFP TAIR Neighbours | pyrophosphate--fructose-6-phosphate 1-phosphotransferase-related / pyrophosphate-dependent 6-phosphofructose-1-kinase-related                                                                                                                                                                                                                                                                                                        |       |          |       | 0.78 |
| At1g10030 | eFP TAIR Neighbours | ERG28 (ARABIDOPSIS HOMOLOG OF YEAST ERGOSTEROL28)                                                                                                                                                                                                                                                                                                                                                                                    | SAM G |          |       | 0.78 |
| At5g64290 | eFP TAIR Neighbours | DCT/DIT2.1 (DICARBOXYLATE TRANSPORT); oxoglutarate:malate antiporter                                                                                                                                                                                                                                                                                                                                                                 | SAM G |          |       | 0.78 |
| At2g01290 | eFP TAIR Neighbours | ribose-5-phosphate isomerase                                                                                                                                                                                                                                                                                                                                                                                                         | SAM G |          |       | 0.78 |
| At5g50740 | eFP TAIR Neighbours | metal ion binding                                                                                                                                                                                                                                                                                                                                                                                                                    | SAM G |          |       | 0.78 |
| At1g55360 | eFP TAIR Neighbours | similar to unknown protein [Arabidopsis thaliana] (TAIR:AT5G56530.1); similar to unknown protein [Arabidopsis thaliana] (TAIR:AT3G13510.1); similar to unnamed protein product [Vitis vinifera] (GB:CAO22094.1); similar to unknown [Populus trichocarpa] (GB:ABK93966.1); similar to hypothetical protein [Vitis vinifera] (GB:CAN72570.1); contains InterPro domain Protein of unknown function DUF239, plant (InterPro:IPR004314) | SAM G |          |       | 0.78 |
| At2g42770 | eFP TAIR Neighbours | peroxisomal membrane 22 kDa family protein                                                                                                                                                                                                                                                                                                                                                                                           | SAM G | ABA Down |       | 0.78 |
| At5g13870 | eFP TAIR Neighbours | EXGT-A4 (ENDOXYLOGLUCCAN TRANSFERASE A4); hydrolase, acting on glycosyl bonds                                                                                                                                                                                                                                                                                                                                                        |       |          | GA Up | 0.78 |
| At5g65010 | eFP TAIR Neighbours | ASN2 (ASPARAGINE SYNTHETASE 2); asparagine synthase (glutamine-hydrolyzing)                                                                                                                                                                                                                                                                                                                                                          |       |          |       | 0.78 |

|                        |                     |                                                                                                                                                                                                                           |       |          |       |      |
|------------------------|---------------------|---------------------------------------------------------------------------------------------------------------------------------------------------------------------------------------------------------------------------|-------|----------|-------|------|
| At1g55200              | eFP TAIR Neighbours | protein kinase family protein                                                                                                                                                                                             |       |          |       | 0.78 |
| At1g18320<br>At3g10110 | eFP TAIR Neighbours | [AT1G18320, mitochondrial import inner membrane translocase subunit Tim17/Tim22/Tim23 family protein];[AT3G10110, MEE67 (maternal effect embryo arrest 67); P-P-bond-hydrolysis-driven protein transmembrane transporter] |       |          |       | 0.78 |
| At2g21260<br>At2g21250 | eFP TAIR Neighbours | [AT2G21260, mannose 6-phosphate reductase (NADPH-dependent), putative];[AT2G21250, mannose 6-phosphate reductase (NADPH-dependent), putative]                                                                             |       |          |       | 0.78 |
| At1g78370              | eFP TAIR Neighbours | ATGSTU20 (Arabidopsis thaliana Glutathione S-transferase (class tau) 20); glutathione transferase                                                                                                                         |       |          |       | 0.78 |
| At2g17280              | eFP TAIR Neighbours | phosphoglycerate/bisphosphoglycerate mutase family protein                                                                                                                                                                | SAM G |          |       | 0.78 |
| At2g22420              | eFP TAIR Neighbours | peroxidase 17 (PER17) (P17)                                                                                                                                                                                               | SAM G |          | GA Up | 0.78 |
| At3g61820              | eFP TAIR Neighbours | aspartyl protease family protein                                                                                                                                                                                          | SAM G |          |       | 0.78 |
| At2g47390              | eFP TAIR Neighbours | serine-type endopeptidase/ serine-type peptidase                                                                                                                                                                          | SAM G |          |       | 0.78 |
| At5g21060              | eFP TAIR Neighbours | homoserine dehydrogenase family protein                                                                                                                                                                                   | SAM G |          |       | 0.78 |
| At3g48700              | eFP TAIR Neighbours | ATCXE13; hydrolase                                                                                                                                                                                                        | SAM G |          |       | 0.78 |
| At3g18800              | eFP TAIR Neighbours | similar to unnamed protein product [Vitis vinifera] (GB:CAO46487.1)                                                                                                                                                       |       |          |       | 0.78 |
| At4g14440              | eFP TAIR Neighbours | enoyl-CoA hydratase/isomerase family protein                                                                                                                                                                              |       | ABA Down |       | 0.78 |
| At3g07430              | eFP TAIR Neighbours | EMB1990 (EMBRYO DEFECTIVE 1990)                                                                                                                                                                                           | SAM G |          |       | 0.78 |
| At4g24330              | eFP TAIR Neighbours | similar to unknown protein [Arabidopsis thaliana] (TAIR:AT5G49945.1); similar to hypothetical protein [Vitis vinifera] (GB:CAN63262.1); contains InterPro domain Protein of unknown function DUF1682 (InterPro:IPR012879) | SAM G |          |       | 0.78 |
| At1g76400              | eFP TAIR Neighbours | ribophorin I family protein                                                                                                                                                                                               |       | ABA Up   |       | 0.78 |
| At3g11630              | eFP TAIR Neighbours | 2-cys peroxiredoxin, chloroplast (BAS1)                                                                                                                                                                                   |       |          |       | 0.78 |
| At3g47520              | eFP TAIR Neighbours | MDH (MALATE DEHYDROGENASE); malate dehydrogenase                                                                                                                                                                          | SAM G |          |       | 0.78 |
| At2g36170              | eFP TAIR Neighbours | ubiquitin extension protein 2 (UBQ2) / 60S ribosomal protein L40 (RPL40A)                                                                                                                                                 |       |          |       | 0.78 |
| At5g53620              | eFP TAIR Neighbours | similar to unnamed protein product [Vitis vinifera] (GB:CAO48590.1)                                                                                                                                                       | SAM G | ABA Up   |       | 0.78 |
| At1g65290              | eFP TAIR Neighbours | MTACP2 (MITOCHONDRIAL ACYL CARRIER PROTEIN 2); acyl carrier                                                                                                                                                               |       |          |       | 0.78 |
| At1g11680              | eFP TAIR Neighbours | CYP51G1 (CYTOCHROME P450 51); oxygen binding                                                                                                                                                                              |       |          |       | 0.78 |
| At5g28060              | eFP TAIR Neighbours | 40S ribosomal protein S24 (RPS24B)                                                                                                                                                                                        |       | ABA Down |       | 0.78 |
| At5g15650<br>At3g02230 | eFP TAIR Neighbours | [AT5G15650, RGP2 (REVERSIBLY GLYCOSYLATED POLYPEPTIDE 2); alpha-1,4-glucan-protein synthase (UDP-forming)];[AT3G02230, RGP1 (REVERSIBLY GLYCOSYLATED POLYPEPTIDE 1)]                                                      |       |          |       | 0.78 |
| At4g10450              | eFP TAIR Neighbours | 60S ribosomal protein L9 (RPL90D)                                                                                                                                                                                         | SAM G |          |       | 0.78 |
| At5g25100              | eFP TAIR Neighbours | endomembrane protein 70, putative                                                                                                                                                                                         | SAM G |          |       | 0.78 |
| At4g37910              | eFP TAIR Neighbours | MTHSC70-1 (mitochondrial heat shock protein 70-1); ATP binding / unfolded protein binding                                                                                                                                 | SAM G | ABA Up   |       | 0.78 |
| At5g08300              | eFP TAIR Neighbours | succinyl-CoA ligase (GDP-forming) alpha-chain, mitochondrial, putative / succinyl-CoA synthetase, alpha chain, putative / SCS-alpha, putative                                                                             | SAM G |          |       | 0.78 |
| At4g26210              | eFP TAIR Neighbours | mitochondrial ATP synthase g subunit family protein                                                                                                                                                                       |       | ABA Down |       | 0.78 |
| At3g59650              | eFP TAIR Neighbours | mitochondrial ribosomal protein L51/S25/Cl-B8 family protein                                                                                                                                                              |       |          |       | 0.78 |
| At1g64860              | eFP TAIR Neighbours | SIGA (SIGMA FACTOR A); DNA binding / DNA-directed RNA polymerase/ transcription factor                                                                                                                                    | SAM G |          |       | 0.77 |
| At3g13560              | eFP TAIR Neighbours | glycosyl hydrolase family 17 protein                                                                                                                                                                                      |       |          |       | 0.77 |
| At3g12930              | eFP TAIR Neighbours | similar to unknown [Populus trichocarpa] (GB:ABK94112.1); contains InterPro domain lojap-related protein (InterPro:IPR004394)                                                                                             | SAM G | ABA Down |       | 0.77 |
| At4g00820              | eFP TAIR Neighbours | IQD17 (IQ-domain 17); calmodulin binding                                                                                                                                                                                  | SAM G |          |       | 0.77 |
| At4g08520<br>At3g09800 | eFP TAIR Neighbours | [AT4G08520, clathrin adaptor complex small chain family protein];[AT3G09800, clathrin adaptor complex small chain family protein]                                                                                         |       |          |       | 0.77 |
| At2g24280              | eFP TAIR Neighbours | serine carboxypeptidase S28 family protein                                                                                                                                                                                |       |          |       | 0.77 |

|           |                     |                                                                                                                                                                                                                                                                                                                                                                                                                                                                                                                   |       |          |       |      |
|-----------|---------------------|-------------------------------------------------------------------------------------------------------------------------------------------------------------------------------------------------------------------------------------------------------------------------------------------------------------------------------------------------------------------------------------------------------------------------------------------------------------------------------------------------------------------|-------|----------|-------|------|
| At1g64650 | eFP TAIR Neighbours | similar to unknown protein [Arabidopsis thaliana] (TAIR:AT4G27720.1); similar to unknown protein [Arabidopsis thaliana] (TAIR:AT3G49310.1); similar to unknown [Populus trichocarpa] (GB:ABK93582.1); similar to unnamed protein product [Vitis vinifera] (GB:CAO48607.1); similar to unnamed protein product [Vitis vinifera] (GB:CAO62932.1); contains InterPro domain Protein of unknown function DUF791 (InterPro:IPR008509); contains InterPro domain MFS general substrate transporter (InterPro:IPR016196) | SAM G |          |       | 0.77 |
| At5g67280 | eFP TAIR Neighbours | RLK (RECEPTOR-LIKE KINASE); ATP binding / kinase/ protein serine/threonine kinase                                                                                                                                                                                                                                                                                                                                                                                                                                 | SAM G | ABA Up   |       | 0.77 |
| At3g17790 | eFP TAIR Neighbours | ATACP5 (acid phosphatase 5); acid phosphatase/ protein serine/threonine phosphatase                                                                                                                                                                                                                                                                                                                                                                                                                               | SAM G |          | GA Up | 0.77 |
| At4g31500 | eFP TAIR Neighbours | CYP83B1 (CYTOCHROME P450 MONOOXYGENASE 83B1); oxygen binding                                                                                                                                                                                                                                                                                                                                                                                                                                                      | SAM G |          | GA Up | 0.77 |
| At1g53580 | eFP TAIR Neighbours | ETHE1/GLX2-3/GLY3 (GLYOXALASE 2-3); hydroxyacylglutathione hydrolase                                                                                                                                                                                                                                                                                                                                                                                                                                              | SAM G |          |       | 0.77 |
| At3g23700 | eFP TAIR Neighbours | S1 RNA-binding domain-containing protein                                                                                                                                                                                                                                                                                                                                                                                                                                                                          | SAM G |          |       | 0.77 |
| At2g32720 | eFP TAIR Neighbours | B5 #4 (cytochrome b5 family protein #4); heme binding / transition metal ion binding                                                                                                                                                                                                                                                                                                                                                                                                                              |       |          |       | 0.77 |
| At3g61100 | eFP TAIR Neighbours | similar to unknown protein [Arabidopsis thaliana] (TAIR:AT3G61090.1); similar to unnamed protein product [Vitis vinifera] (GB:CAO40196.1); contains InterPro domain Protein of unknown function DUF537 (InterPro:IPR007491)                                                                                                                                                                                                                                                                                       | SAM G |          |       | 0.77 |
| At2g28080 | eFP TAIR Neighbours | glycosyltransferase family protein                                                                                                                                                                                                                                                                                                                                                                                                                                                                                | SAM G | ABA Down |       | 0.77 |
| At5g51750 | eFP TAIR Neighbours | ATSBT1.3; subtilase                                                                                                                                                                                                                                                                                                                                                                                                                                                                                               | SAM G |          | GA Up | 0.77 |
| At2g33180 | eFP TAIR Neighbours | similar to unnamed protein product [Vitis vinifera] (GB:CAO41107.1)                                                                                                                                                                                                                                                                                                                                                                                                                                               |       | ABA Down |       | 0.77 |
| At3g55420 | eFP TAIR Neighbours | similar to hypothetical protein [Vitis vinifera] (GB:CAN83699.1)                                                                                                                                                                                                                                                                                                                                                                                                                                                  | SAM G |          |       | 0.77 |
| At3g04650 | eFP TAIR Neighbours | oxidoreductase                                                                                                                                                                                                                                                                                                                                                                                                                                                                                                    | SAM G | ABA Down |       | 0.77 |
| At2g36880 | eFP TAIR Neighbours | MAT3 (METHIONINE ADENOSYLTRANSFERASE 3); methionine adenosyltransferase                                                                                                                                                                                                                                                                                                                                                                                                                                           | SAM G |          |       | 0.77 |
| At5g38110 | eFP TAIR Neighbours | ASF1B/SGA01/SGA1 (ANTI- SILENCING FUNCTION 1B)                                                                                                                                                                                                                                                                                                                                                                                                                                                                    |       |          |       | 0.77 |
| At2g39870 | eFP TAIR Neighbours | similar to unknown protein [Arabidopsis thaliana] (TAIR:AT3G55690.1); similar to unnamed protein product [Vitis vinifera] (GB:CAO69095.1)                                                                                                                                                                                                                                                                                                                                                                         | SAM G | ABA Up   |       | 0.77 |
| At4g34265 | eFP TAIR Neighbours | similar to unknown protein [Arabidopsis thaliana] (TAIR:AT2G15000.3); similar to unknown protein [Arabidopsis thaliana] (TAIR:AT2G15000.2); similar to unnamed protein product [Vitis vinifera] (GB:CAO70855.1)                                                                                                                                                                                                                                                                                                   |       |          |       | 0.77 |
| At4g17520 | eFP TAIR Neighbours | nuclear RNA-binding protein, putative                                                                                                                                                                                                                                                                                                                                                                                                                                                                             |       |          |       | 0.77 |
| At1g31970 | eFP TAIR Neighbours | STRS1 (STRESS RESPONSE SUPPRESSOR 1); ATP-dependent helicase                                                                                                                                                                                                                                                                                                                                                                                                                                                      | SAM G |          |       | 0.77 |
| At5g13510 | eFP TAIR Neighbours | ribosomal protein L10 family protein                                                                                                                                                                                                                                                                                                                                                                                                                                                                              | SAM G | ABA Down |       | 0.77 |
| At5g56260 | eFP TAIR Neighbours | dimethylmenaquinone methyltransferase family protein                                                                                                                                                                                                                                                                                                                                                                                                                                                              | SAM G | ABA Down |       | 0.77 |
| At5g45920 | eFP TAIR Neighbours | carboxylesterase                                                                                                                                                                                                                                                                                                                                                                                                                                                                                                  | SAM G | ABA Up   |       | 0.77 |
| At1g34030 | eFP TAIR Neighbours | 40S ribosomal protein S18 (RPS18B)                                                                                                                                                                                                                                                                                                                                                                                                                                                                                |       | ABA Down |       | 0.77 |
| At1g64090 | eFP TAIR Neighbours | reticulon family protein (RTN1B3)                                                                                                                                                                                                                                                                                                                                                                                                                                                                                 | SAM G |          |       | 0.77 |
| At5g24610 | eFP TAIR Neighbours | similar to unknown protein [Arabidopsis thaliana] (TAIR:AT3G49550.1); similar to hypothetical protein [Vitis vinifera] (GB:CAN64634.1)                                                                                                                                                                                                                                                                                                                                                                            | SAM G |          |       | 0.77 |
| At3g11710 | eFP TAIR Neighbours | lysyl-tRNA synthetase, putative / lysine--tRNA ligase, putative                                                                                                                                                                                                                                                                                                                                                                                                                                                   |       |          |       | 0.77 |
| At3g22300 | eFP TAIR Neighbours | RPS10 (RIBOSOMAL PROTEIN S10); structural constituent of ribosome                                                                                                                                                                                                                                                                                                                                                                                                                                                 |       |          |       | 0.77 |
| At3g45310 | eFP TAIR Neighbours | cysteine proteinase, putative                                                                                                                                                                                                                                                                                                                                                                                                                                                                                     |       |          |       | 0.77 |
| At1g53240 | eFP TAIR Neighbours | malate dehydrogenase (NAD), mitochondrial                                                                                                                                                                                                                                                                                                                                                                                                                                                                         |       |          |       | 0.77 |
| At5g60670 | eFP TAIR Neighbours | 60S ribosomal protein L12 (RPL12C)                                                                                                                                                                                                                                                                                                                                                                                                                                                                                |       |          |       | 0.77 |
| At5g11340 | eFP TAIR Neighbours | GCN5-related N-acetyltransferase (GNAT) family protein                                                                                                                                                                                                                                                                                                                                                                                                                                                            |       |          |       | 0.77 |
| At1g79560 | eFP TAIR Neighbours | EMB1047/FTSH12 (EMBRYO DEFECTIVE 1047); ATP-dependent peptidase/ ATPase/ metallopeptidase                                                                                                                                                                                                                                                                                                                                                                                                                         | SAM G |          |       | 0.77 |
| At5g55280 | eFP TAIR Neighbours | FTSZ1-1 (FtsZ1-1); structural molecule                                                                                                                                                                                                                                                                                                                                                                                                                                                                            |       |          |       | 0.77 |

|                        |                        |                                                                                                                                                                                                                                                                                                          |       |          |       |      |
|------------------------|------------------------|----------------------------------------------------------------------------------------------------------------------------------------------------------------------------------------------------------------------------------------------------------------------------------------------------------|-------|----------|-------|------|
| At5g17920<br>At3g03780 | eFP TAIR<br>Neighbours | [AT5G17920, ATCIMS (COBALAMIN-INDEPENDENT METHIONINE SYNTHASE); 5-methyltetrahydropteroyltryglutamate-homocysteine S-methyltransferase/ methionine synthase];[AT3G03780, AtMS2 (Arabidopsis thaliana methionine synthase 2); 5-methyltetrahydropteroyltryglutamate-homocysteine S-methyltransferase]     |       |          |       | 0.77 |
| At5g08280              | eFP TAIR<br>Neighbours | HEMC (HYDROXYMETHYLBILANE SYNTHASE); hydroxymethylbilane synthase                                                                                                                                                                                                                                        | SAM G | ABA Down |       | 0.77 |
| At1g29980              | eFP TAIR<br>Neighbours | similar to unknown protein [Arabidopsis thaliana] (TAIR:AT2G34510.1); similar to unknown [Populus trichocarpa] (GB:ABK95079.1); contains InterPro domain Protein of unknown function DUF642 (InterPro:IPR006946); contains InterPro domain Galactose-binding like (InterPro:IPR008979)                   |       |          |       | 0.77 |
| At1g14670              | eFP TAIR<br>Neighbours | endomembrane protein 70, putative                                                                                                                                                                                                                                                                        | SAM G |          |       | 0.77 |
| At2g33210              | eFP TAIR<br>Neighbours | chaperonin, putative                                                                                                                                                                                                                                                                                     | SAM G |          |       | 0.77 |
| At2g44650              | eFP TAIR<br>Neighbours | CHL-CPN10 (chloroplast chaperonin 10)                                                                                                                                                                                                                                                                    | SAM G | ABA Down |       | 0.77 |
| At1g50900              | eFP TAIR<br>Neighbours | similar to hypothetical protein [Vitis vinifera] (GB:CAN65357.1); similar to unnamed protein product [Vitis vinifera] (GB:CAO38995.1); contains InterPro domain Ankyrin (InterPro:IPR002110)                                                                                                             |       | ABA Down |       | 0.76 |
| At4g39690              | eFP TAIR<br>Neighbours | similar to unknown [Populus trichocarpa] (GB:ABK94999.1); contains domain PTHR15415 (PTHR15415)                                                                                                                                                                                                          | SAM G |          |       | 0.76 |
| At2g24150              | eFP TAIR<br>Neighbours | HHP3 (heptahelical protein 3); receptor                                                                                                                                                                                                                                                                  | SAM G |          |       | 0.76 |
| At1g30820              | eFP TAIR<br>Neighbours | CTP synthase, putative / UTP--ammonia ligase, putative                                                                                                                                                                                                                                                   | SAM G | ABA Up   |       | 0.76 |
| At1g71500              | eFP TAIR<br>Neighbours | Rieske (2Fe-2S) domain-containing protein                                                                                                                                                                                                                                                                | SAM G |          |       | 0.76 |
| At1g28510              | eFP TAIR<br>Neighbours | similar to unknown protein [Arabidopsis thaliana] (TAIR:AT3G58150.1); similar to unnamed protein product [Vitis vinifera] (GB:CAO66379.1); contains InterPro domain Optic atrophy 3-like (InterPro:IPR010754)                                                                                            | SAM G |          |       | 0.76 |
| At2g37620<br>At3g53750 | eFP TAIR<br>Neighbours | [AT2G37620, ACT1 (ACTIN 1); structural constituent of cytoskeleton];[AT3G53750, ACT3 (ACTIN 3); structural constituent of cytoskeleton]                                                                                                                                                                  |       |          |       | 0.76 |
| At4g04640              | eFP TAIR<br>Neighbours | ATPC1 (ATP synthase gamma chain 1)                                                                                                                                                                                                                                                                       |       | ABA Down |       | 0.76 |
| At2g05790              | eFP TAIR<br>Neighbours | glycosyl hydrolase family 17 protein                                                                                                                                                                                                                                                                     | SAM G |          |       | 0.76 |
| At5g57170              | eFP TAIR<br>Neighbours | macrophage migration inhibitory factor family protein / MIF family protein                                                                                                                                                                                                                               | SAM G |          |       | 0.76 |
| At4g38660              | eFP TAIR<br>Neighbours | thaumatin, putative                                                                                                                                                                                                                                                                                      |       |          |       | 0.76 |
| At5g44650              | eFP TAIR<br>Neighbours | similar to unnamed protein product [Vitis vinifera] (GB:CAO44475.1)                                                                                                                                                                                                                                      |       |          |       | 0.76 |
| At5g09650              | eFP TAIR<br>Neighbours | ATPPA6 (ARABIDOPSIS THALIANA PYROPHOSPHORYLASE 6); inorganic diphosphatase/ pyrophosphatase                                                                                                                                                                                                              |       |          |       | 0.76 |
| At5g18460              | eFP TAIR<br>Neighbours | similar to unknown protein [Arabidopsis thaliana] (TAIR:AT1G23340.1); similar to unknown protein [Arabidopsis thaliana] (TAIR:AT1G23340.2); similar to unnamed protein product [Vitis vinifera] (GB:CAO38766.1); contains InterPro domain Protein of unknown function DUF239, plant (InterPro:IPR004314) | SAM G |          |       | 0.76 |
| At3g26060              | eFP TAIR<br>Neighbours | ATPRX Q; antioxidant/ peroxiredoxin                                                                                                                                                                                                                                                                      | SAM G | ABA Down |       | 0.76 |
| At5g40160              | eFP TAIR<br>Neighbours | EMB506 (EMBRYO DEFECTIVE 506); protein binding                                                                                                                                                                                                                                                           |       |          |       | 0.76 |
| At4g32915              | eFP TAIR<br>Neighbours | glutamyl-tRNA(Gln) amidotransferase                                                                                                                                                                                                                                                                      | SAM G | ABA Down |       | 0.76 |
| At2g39890              | eFP TAIR<br>Neighbours | ProT1 (PROLINE TRANSPORTER 1); amino acid transmembrane transporter                                                                                                                                                                                                                                      |       |          |       | 0.76 |
| At1g33040              | eFP TAIR<br>Neighbours | NACA5 (NASCENT POLYPEPTIDE-ASSOCIATED COMPLEX SUBUNIT ALPHA-LIKE PROTEIN 5)                                                                                                                                                                                                                              |       |          |       | 0.76 |
| At2g26900              | eFP TAIR<br>Neighbours | bile acid:sodium symporter family protein                                                                                                                                                                                                                                                                | SAM G |          |       | 0.76 |
| At4g37510              | eFP TAIR<br>Neighbours | ribonuclease III family protein                                                                                                                                                                                                                                                                          |       |          |       | 0.76 |
| At2g38120              | eFP TAIR<br>Neighbours | AUX1 (AUXIN RESISTANT 1); amino acid transmembrane transporter/ transporter                                                                                                                                                                                                                              | SAM G | ABA Down | GA Up | 0.76 |
| At2g40010              | eFP TAIR<br>Neighbours | 60S acidic ribosomal protein P0 (RPP0A)                                                                                                                                                                                                                                                                  |       |          |       | 0.76 |
| At3g04760              | eFP TAIR<br>Neighbours | pentatricopeptide (PPR) repeat-containing protein                                                                                                                                                                                                                                                        | SAM G | ABA Down |       | 0.76 |
| At2g25830              | eFP TAIR<br>Neighbours | YebC-related                                                                                                                                                                                                                                                                                             |       |          |       | 0.76 |
| At5g65310              | eFP TAIR<br>Neighbours | ATHB5 (ARABIDOPSIS THALIANA HOMEBOX PROTEIN 5); transcription factor                                                                                                                                                                                                                                     | SAM G |          |       | 0.76 |

|           |                     |                                                                                                                                                                                                                                                                                                            |       |          |       |      |
|-----------|---------------------|------------------------------------------------------------------------------------------------------------------------------------------------------------------------------------------------------------------------------------------------------------------------------------------------------------|-------|----------|-------|------|
| At1g20050 | eFP TAIR Neighbours | HYD1 (Hydra 1)                                                                                                                                                                                                                                                                                             | SAM G |          |       | 0.76 |
| At2g04030 | eFP TAIR Neighbours | CR88 (EMBRYO DEFECTIVE 1956); ATP binding                                                                                                                                                                                                                                                                  | SAM G |          |       | 0.76 |
| At5g17630 | eFP TAIR Neighbours | glucose-6-phosphate/phosphate translocator, putative                                                                                                                                                                                                                                                       | SAM G |          |       | 0.76 |
| At3g55410 | eFP TAIR Neighbours | 2-oxoglutarate dehydrogenase E1 component, putative / oxoglutarate decarboxylase, putative / alpha-ketoglutaric dehydrogenase, putative                                                                                                                                                                    | SAM G |          |       | 0.76 |
| At3g63410 | eFP TAIR Neighbours | APG1 (ALBINO OR PALE GREEN MUTANT 1); methyltransferase                                                                                                                                                                                                                                                    |       |          |       | 0.76 |
| At5g17560 | eFP TAIR Neighbours | BolA-like family protein                                                                                                                                                                                                                                                                                   | SAM G |          |       | 0.76 |
| At1g13320 | eFP TAIR Neighbours | PP2AA3/PR65 (PROTEIN PHOSPHATASE 2A SUBUNIT A3); protein phosphatase type 2A regulator                                                                                                                                                                                                                     | SAM G | ABA Up   |       | 0.76 |
| At4g30930 | eFP TAIR Neighbours | NFD1 (NUCLEAR FUSION DEFECTIVE 1); structural constituent of ribosome                                                                                                                                                                                                                                      |       |          |       | 0.76 |
| At3g20330 | eFP TAIR Neighbours | aspartate carbamoyltransferase, chloroplast / aspartate transcarbamylase / ATCase (PYRB)                                                                                                                                                                                                                   |       |          |       | 0.76 |
| At4g35000 | eFP TAIR Neighbours | APX3 (ASCORBATE PEROXIDASE 3); L-ascorbate peroxidase                                                                                                                                                                                                                                                      |       | ABA Down |       | 0.76 |
| At5g64030 | eFP TAIR Neighbours | dehydration-responsive protein-related                                                                                                                                                                                                                                                                     | SAM G |          |       | 0.76 |
| At3g20390 | eFP TAIR Neighbours | endoribonuclease L-PSP family protein                                                                                                                                                                                                                                                                      | SAM G |          |       | 0.76 |
| At3g04770 | eFP TAIR Neighbours | RPSAB (40S RIBOSOMAL PROTEIN SA B); structural constituent of ribosome                                                                                                                                                                                                                                     | SAM G |          |       | 0.76 |
| At5g14450 | eFP TAIR Neighbours | GDSL-motif lipase/hydrolase family protein                                                                                                                                                                                                                                                                 |       |          |       | 0.76 |
| At5g08530 | eFP TAIR Neighbours | CI51 (51 KDA SUBUNIT OF COMPLEX I); NADH dehydrogenase (ubiquinone)                                                                                                                                                                                                                                        |       |          |       | 0.76 |
| At4g25890 | eFP TAIR Neighbours | 60S acidic ribosomal protein P3 (RPP3A)                                                                                                                                                                                                                                                                    |       |          |       | 0.76 |
| At3g01540 | eFP TAIR Neighbours | DRH1 (DEAD box RNA helicase 1)                                                                                                                                                                                                                                                                             | SAM G |          |       | 0.76 |
| At4g12600 | eFP TAIR Neighbours | ribosomal protein L7Ae/L30e/S12e/Gadd45 family protein                                                                                                                                                                                                                                                     |       |          |       | 0.76 |
| At4g34290 | eFP TAIR Neighbours | SWIB complex BAF60b domain-containing protein                                                                                                                                                                                                                                                              |       |          |       | 0.76 |
| At3g23990 | eFP TAIR Neighbours | HSP60 (Heat shock protein 60); ATP binding / protein binding / unfolded protein binding                                                                                                                                                                                                                    |       |          |       | 0.76 |
| At2g44050 | eFP TAIR Neighbours | COS1 (COI1 SUPPRESSOR1); 6,7-dimethyl-8-ribyllumazine synthase                                                                                                                                                                                                                                             | SAM G |          |       | 0.76 |
| At5g57290 | eFP TAIR Neighbours | 60S acidic ribosomal protein P3 (RPP3B)                                                                                                                                                                                                                                                                    |       |          |       | 0.76 |
| At5g63510 | eFP TAIR Neighbours | GAMMA CAL1 (GAMMA CARBONIC ANHYDRASE LIKE 1); carbonate dehydratase                                                                                                                                                                                                                                        |       |          |       | 0.76 |
| At5g61170 | eFP TAIR Neighbours | 40S ribosomal protein S19 (RPS19C)                                                                                                                                                                                                                                                                         |       |          |       | 0.76 |
| At3g54090 | eFP TAIR Neighbours | pfkB-type carbohydrate kinase family protein                                                                                                                                                                                                                                                               |       |          |       | 0.76 |
| At1g60090 | eFP TAIR Neighbours | glycosyl hydrolase family 1 protein                                                                                                                                                                                                                                                                        | SAM G |          |       | 0.75 |
| At4g03210 | eFP TAIR Neighbours | XTH9 (XYLOGLUCAN ENDOTRANSGLUCOSYLASE/HYDROLASE 9); hydrolase, acting on glycosyl bonds                                                                                                                                                                                                                    |       | ABA Down | GA Up | 0.75 |
| At3g16950 | eFP TAIR Neighbours | LPD1 (LIPOAMIDE DEHYDROGENASE 1)                                                                                                                                                                                                                                                                           |       |          |       | 0.75 |
| At1g10200 | eFP TAIR Neighbours | WLIM1; transcription factor                                                                                                                                                                                                                                                                                |       | ABA Down |       | 0.75 |
| At1g66150 | eFP TAIR Neighbours | TMK1 (TRANSMEMBRANE KINASE 1)                                                                                                                                                                                                                                                                              |       |          |       | 0.75 |
| At1g47960 | eFP TAIR Neighbours | C/VIF1 (CELL WALL / VACUOLAR INHIBITOR OF FRUCTOSIDASE 1); pectinesterase inhibitor                                                                                                                                                                                                                        |       | ABA Down |       | 0.75 |
| At4g34980 | eFP TAIR Neighbours | SLP2 (subtilisin-like serine protease 2); subtilase                                                                                                                                                                                                                                                        | SAM G | ABA Up   | GA Up | 0.75 |
| At5g10240 | eFP TAIR Neighbours | ASN3 (ASPARAGINE SYNTHETASE 3); asparagine synthase (glutamine-hydrolyzing)                                                                                                                                                                                                                                | SAM G | ABA Up   |       | 0.75 |
| At1g23080 | eFP TAIR Neighbours | PIN7 (PIN-FORMED 7); auxin:hydrogen symporter/ transporter                                                                                                                                                                                                                                                 | SAM G |          | GA Up | 0.75 |
| At4g34760 | eFP TAIR Neighbours | auxin-responsive family protein                                                                                                                                                                                                                                                                            | SAM G | ABA Up   |       | 0.75 |
| At1g21740 | eFP TAIR Neighbours | similar to unknown protein [Arabidopsis thaliana] (TAIR:AT1G77500.1); similar to hypothetical protein [Vitis vinifera] (GB:CAN81539.1); contains InterPro domain Protein of unknown function DUF632 (InterPro:IPR006867); contains InterPro domain Protein of unknown function DUF630 (InterPro:IPR006868) | SAM G | ABA Up   |       | 0.75 |
| At2g20515 | eFP TAIR Neighbours | similar to unnamed protein product [Vitis vinifera] (GB:CAO40634.1)                                                                                                                                                                                                                                        |       |          |       | 0.75 |
| At4g30330 | eFP TAIR Neighbours | small nuclear ribonucleoprotein E, putative / snRNP-E, putative / Sm protein E, putative                                                                                                                                                                                                                   |       | ABA Down |       | 0.75 |
| At5g65700 | eFP TAIR Neighbours | BAM1 (big apical meristem 1); ATP binding / kinase/ protein serine/threonine kinase                                                                                                                                                                                                                        |       |          |       | 0.75 |

|                        |                     |                                                                                                                                                                                                                                                                                                                                                                                                                                                                               |       |          |       |      |
|------------------------|---------------------|-------------------------------------------------------------------------------------------------------------------------------------------------------------------------------------------------------------------------------------------------------------------------------------------------------------------------------------------------------------------------------------------------------------------------------------------------------------------------------|-------|----------|-------|------|
| At5g19520              | eFP TAIR Neighbours | mechanosensitive ion channel domain-containing protein / MS ion channel domain-containing protein                                                                                                                                                                                                                                                                                                                                                                             | SAM G |          |       | 0.75 |
| At2g20610              | eFP TAIR Neighbours | SUR1 (SUPERROOT 1); transaminase                                                                                                                                                                                                                                                                                                                                                                                                                                              | SAM G | ABA Up   | GA Up | 0.75 |
| At2g37660              | eFP TAIR Neighbours | binding / catalytic/ coenzyme binding                                                                                                                                                                                                                                                                                                                                                                                                                                         |       | ABA Down |       | 0.75 |
| At1g10760              | eFP TAIR Neighbours | SEX1 (STARCH EXCESS 1)                                                                                                                                                                                                                                                                                                                                                                                                                                                        |       |          |       | 0.75 |
| At1g50010              | eFP TAIR Neighbours | TUA2 (tubulin alpha-2 chain)                                                                                                                                                                                                                                                                                                                                                                                                                                                  |       |          |       | 0.75 |
| At5g65650              | eFP TAIR Neighbours | similar to unknown protein [Arabidopsis thaliana] (TAIR:AT4G36660.1); similar to unknown [Populus trichocarpa] (GB:ABK93535.1); contains InterPro domain Protein of unknown function DUF1195 (InterPro:IPR010608)                                                                                                                                                                                                                                                             | SAM G | ABA Down |       | 0.75 |
| At2g38810              | eFP TAIR Neighbours | HTA8; DNA binding                                                                                                                                                                                                                                                                                                                                                                                                                                                             |       |          |       | 0.75 |
| At1g26740              | eFP TAIR Neighbours | structural constituent of ribosome                                                                                                                                                                                                                                                                                                                                                                                                                                            |       |          |       | 0.75 |
| At4g36180              | eFP TAIR Neighbours | leucine-rich repeat family protein                                                                                                                                                                                                                                                                                                                                                                                                                                            | SAM G | ABA Up   |       | 0.75 |
| At5g25020<br>At5g24990 | eFP TAIR Neighbours | [AT5G25020, similar to unknown protein [Arabidopsis thaliana] (TAIR:AT5G24990.1); similar to hypothetical protein [Vitis vinifera] (GB:CAN83078.1); contains InterPro domain Protein of unknown function DUF1336 (InterPro:IPR009769)];[AT5G24990, similar to unknown protein [Arabidopsis thaliana] (TAIR:AT5G25010.1); similar to hypothetical protein [Vitis vinifera] (GB:CAN83078.1); contains InterPro domain Protein of unknown function DUF1336 (InterPro:IPR009769)] |       |          |       | 0.75 |
| At3g63200              | eFP TAIR Neighbours | PLA IIIB/PLP9 (Patatin-like protein 9); nutrient reservoir                                                                                                                                                                                                                                                                                                                                                                                                                    |       |          |       | 0.75 |
| At3g27230              | eFP TAIR Neighbours | similar to (ARABIDOPSIS THALIANA RAS ASSOCIATED WITH DIABETES PROTEIN 3), methyltransferase [Arabidopsis thaliana] (TAIR:AT5G40830.1); similar to (ARABIDOPSIS THALIANA RAS ASSOCIATED WITH DIABETES PROTEIN 3), methyltransferase [Arabidopsis thaliana] (TAIR:AT5G40830.2); similar to hypothetical protein [Prunus persica] (GB:AAO14627.1); contains domain SSF53335 (SSF53335)                                                                                           | SAM G | ABA Down |       | 0.75 |
| At1g09390              | eFP TAIR Neighbours | GDSL-motif lipase/hydrolase family protein                                                                                                                                                                                                                                                                                                                                                                                                                                    |       |          |       | 0.75 |
| At5g15520              | eFP TAIR Neighbours | 40S ribosomal protein S19 (RPS19B)                                                                                                                                                                                                                                                                                                                                                                                                                                            |       | ABA Down |       | 0.75 |
| At2g23350              | eFP TAIR Neighbours | PAB4 (POLY(A) BINDING PROTEIN 4); RNA binding / translation initiation factor                                                                                                                                                                                                                                                                                                                                                                                                 |       |          |       | 0.75 |
| At4g32390              | eFP TAIR Neighbours | phosphate translocator-related                                                                                                                                                                                                                                                                                                                                                                                                                                                | SAM G |          |       | 0.75 |
| At5g27470              | eFP TAIR Neighbours | seryl-tRNA synthetase / serine--tRNA ligase                                                                                                                                                                                                                                                                                                                                                                                                                                   |       |          |       | 0.75 |
| At3g04120              | eFP TAIR Neighbours | GAPC (GLYCERALDEHYDE-3-PHOSPHATE DEHYDROGENASE C SUBUNIT); glyceraldehyde-3-phosphate dehydrogenase                                                                                                                                                                                                                                                                                                                                                                           |       |          |       | 0.75 |
| At3g52930              | eFP TAIR Neighbours | fructose-bisphosphate aldolase, putative                                                                                                                                                                                                                                                                                                                                                                                                                                      |       |          |       | 0.75 |
| At1g47260              | eFP TAIR Neighbours | APFI; carbonate dehydratase                                                                                                                                                                                                                                                                                                                                                                                                                                                   |       | ABA Down |       | 0.75 |
| At2g32920              | eFP TAIR Neighbours | ATPDIL2-3 (PDI-LIKE 2-3); protein disulfide isomerase                                                                                                                                                                                                                                                                                                                                                                                                                         |       | ABA Down |       | 0.75 |
| At3g20820              | eFP TAIR Neighbours | leucine-rich repeat family protein                                                                                                                                                                                                                                                                                                                                                                                                                                            | SAM G |          |       | 0.75 |
| At3g03250              | eFP TAIR Neighbours | UGP (UDP-glucose pyrophosphorylase); UTP:glucose-1-phosphate uridylyltransferase                                                                                                                                                                                                                                                                                                                                                                                              | SAM G | ABA Down |       | 0.75 |
| At3g13580              | eFP TAIR Neighbours | 60S ribosomal protein L7 (RPL7D)                                                                                                                                                                                                                                                                                                                                                                                                                                              |       |          |       | 0.75 |
| At4g02930              | eFP TAIR Neighbours | elongation factor Tu, putative / EF-Tu, putative                                                                                                                                                                                                                                                                                                                                                                                                                              |       |          |       | 0.75 |
| At2g33840<br>At1g28350 | eFP TAIR Neighbours | [AT2G33840, tRNA synthetase class I (W and Y) family protein];[AT1G28350, ATP binding / aminoacyl-tRNA ligase]                                                                                                                                                                                                                                                                                                                                                                |       |          |       | 0.75 |
| At2g16600              | eFP TAIR Neighbours | ROC3 (rotamase CyP 3); peptidyl-prolyl cis-trans isomerase                                                                                                                                                                                                                                                                                                                                                                                                                    |       |          |       | 0.75 |
| At4g28440              | eFP TAIR Neighbours | DNA-binding protein-related                                                                                                                                                                                                                                                                                                                                                                                                                                                   |       |          |       | 0.75 |
| At4g26300              | eFP TAIR Neighbours | EMB1027 (EMBRYO DEFECTIVE 1027); ATP binding / arginine-tRNA ligase                                                                                                                                                                                                                                                                                                                                                                                                           | SAM G |          |       | 0.75 |
| At1g05190              | eFP TAIR Neighbours | EMB2394 (EMBRYO DEFECTIVE 2394); structural constituent of ribosome                                                                                                                                                                                                                                                                                                                                                                                                           |       | ABA Down |       | 0.75 |
| At4g28210              | eFP TAIR Neighbours | EMB1923 (EMBRYO DEFECTIVE 1923)                                                                                                                                                                                                                                                                                                                                                                                                                                               | SAM G |          |       | 0.75 |
| At1g75330              | eFP TAIR Neighbours | OTC (ORNITHINE CARBAMOYLTRANSFERASE); amino acid binding / carboxyl- or carbamoyltransferase                                                                                                                                                                                                                                                                                                                                                                                  |       |          |       | 0.75 |
| At2g40660              | eFP TAIR Neighbours | tRNA-binding region domain-containing protein                                                                                                                                                                                                                                                                                                                                                                                                                                 |       |          |       | 0.75 |
| At4g02380              | eFP TAIR Neighbours | SAG21 (SENESCENCE-ASSOCIATED GENE 21)                                                                                                                                                                                                                                                                                                                                                                                                                                         |       | ABA Down |       | 0.75 |

|           |                     |                                                                                          |       |          |  |      |
|-----------|---------------------|------------------------------------------------------------------------------------------|-------|----------|--|------|
| At3g55010 | eFP TAIR Neighbours | ATPURN/PUR5; phosphoribosylformylglycinamide cyclo-ligase                                |       |          |  | 0.75 |
| At2g18040 | eFP TAIR Neighbours | PIN1AT (parvulin 1At)                                                                    |       |          |  | 0.75 |
| At5g40200 | eFP TAIR Neighbours | DEGP9 (DEGP PROTEASE 9); serine-type peptidase/ trypsin                                  | SAM G |          |  | 0.75 |
| At2g45740 | eFP TAIR Neighbours | PEX11D                                                                                   | SAM G |          |  | 0.75 |
| At5g24650 | eFP TAIR Neighbours | mitochondrial import inner membrane translocase subunit Tim17/Tim22/Tim23 family protein | SAM G |          |  | 0.75 |
| At3g15190 | eFP TAIR Neighbours | chloroplast 30S ribosomal protein S20, putative                                          |       | ABA Down |  | 0.75 |
| At5g19290 | eFP TAIR Neighbours | esterase/lipase/thioesterase family protein                                              | SAM G | ABA Down |  | 0.75 |

Candidate gene *At5g10920* as identified on IL 4-3 putatively associated with glycolysis and correlated genes as generated by SeedNet available on <http://vseednet.nottingham.ac.uk>. The candidate gene is involved in Arg biosynthesis. The correlated genes are supplied with the Pearson correlation coefficient values. Correlated genes of relevance to glycolysis are highlighted in grey. Localization of gene candidates was achieved by utilizing data as analyzed on dry IL seeds of harvest seasons I and II in Akko, Israel.
