# Supplementary material for: Metabolic Profiling of a Mapping Population Exposes New Insights in the Regulation of Seed Metabolism and Seed, Fruit, and Plant Relations
Source: PLoS Genet. 2012 Mar 29;8(3):e1002612. doi: 10.1371/journal.pgen.1002612 (PMC3315483; doi:10.1371/journal.pgen.1002612)
Supplement: Table S3 — Candidate gene At5g63840 and its correlated genes associated with glycolysis on IL 4-3-2. Candidate gene At5g63840 as identified on IL 4-3-2 putatively associated with glycolysis and co-predicted genes as generated by SCoPNET available on http://vseednet.nottingham.ac.uk. The candidate gene is involved in cellulose biosynthetic processes with glucosidase and hydrolase activities. The co-predicted genes are supplied with the co-prediction PMI values. Co-predicted genes of relevance to glycolysis are highlighted in grey. Localization of gene candidates was achieved by utilizing data as analyzed on dry IL seeds of harvest seasons I and II in Akko, Israel. (PDF) [file pgen.1002612.s012.pdf]

SCoPNET Co-Prediction Table S3. Candidate gene *At5g63840* and its correlated genes associated with Glycolysis on IL 4-3-2.

| AGI                 | Links               | Annotation                                                                                                                                                                                                                                                                                                                                                                                                                                                                                                  | ABA Regulation | GA Regulation | Dormancy Node Strength | Germination Node Strength | PMI score |
|---------------------|---------------------|-------------------------------------------------------------------------------------------------------------------------------------------------------------------------------------------------------------------------------------------------------------------------------------------------------------------------------------------------------------------------------------------------------------------------------------------------------------------------------------------------------------|----------------|---------------|------------------------|---------------------------|-----------|
| At5g67320           | eFP TAIR Neighbours | WD-40 repeat family protein                                                                                                                                                                                                                                                                                                                                                                                                                                                                                 |                |               | 1                      | 3                         | 7.38      |
| At5g17790           | eFP TAIR Neighbours | VAR3 (VARIEGATED 3); binding                                                                                                                                                                                                                                                                                                                                                                                                                                                                                |                |               | 0                      | 4                         | 7.38      |
| At5g27210           | eFP TAIR Neighbours | similar to transmembrane protein, putative [Arabidopsis thaliana] (TAIR:AT3G05010.1); similar to unnamed protein product [Vitis vinifera] (GB:CAO15118.1)                                                                                                                                                                                                                                                                                                                                                   | Col ABA UP     |               | 3                      | 3                         | 6.98      |
| At2g26930           | eFP TAIR Neighbours | ATCDPMEK (PIGMENT DEFECTIVE 277); 4-(cytidine 5'-diphospho)-2-C-methyl-D-erythritol kinase                                                                                                                                                                                                                                                                                                                                                                                                                  |                |               | 3                      | 5                         | 6.69      |
| At4g01790           | eFP TAIR Neighbours | ribosomal protein L7Ae/L30e/S12e/Gadd45 family protein / ribonuclease P-related                                                                                                                                                                                                                                                                                                                                                                                                                             |                |               | 2                      | 6                         | 6.69      |
| At5g01400           | eFP TAIR Neighbours | ESP4 (ENHANCED SILENCING PHENOTYPE 4); binding                                                                                                                                                                                                                                                                                                                                                                                                                                                              | Col ABA UP     |               | 4                      | 4                         | 6.69      |
| At1g69450           | eFP TAIR Neighbours | similar to HYP1 (HYPOTHETICAL PROTEIN 1) [Arabidopsis thaliana] (TAIR:AT3G01100.1); similar to unnamed protein product [Vitis vinifera] (GB:CAO64743.1); similar to unnamed protein product [Vitis vinifera] (GB:CAO15025.1); similar to Protein of unknown function DUF221 [Medicago truncatula] (GB:ABN08272.1); contains InterPro domain Protein of unknown function DUF221; (InterPro:IPR003864)                                                                                                        |                |               | 6                      | 3                         | 6.57      |
| At1g57870           | eFP TAIR Neighbours | shaggy-related protein kinase kappa, putative / ASK-kappa, putative                                                                                                                                                                                                                                                                                                                                                                                                                                         |                |               | 7                      | 3                         | 6.47      |
| At3g49320           | eFP TAIR Neighbours | similar to unknown protein [Arabidopsis thaliana] (TAIR:AT5G41970.1); similar to unnamed protein product [Vitis vinifera] (GB:CAO62930.1); contains InterPro domain Metal-dependent protein hydrolase (InterPro:IPR003226)                                                                                                                                                                                                                                                                                  |                |               | 0                      | 10                        | 6.47      |
| At3g52230           | eFP TAIR Neighbours | similar to unknown [Populus trichocarpa] (GB:ABK93315.1)                                                                                                                                                                                                                                                                                                                                                                                                                                                    |                | GA Down       | 4                      | 6                         | 6.47      |
| At2g47240           | eFP TAIR Neighbours | long-chain-fatty-acid--CoA ligase family protein / long-chain acyl-CoA synthetase family protein                                                                                                                                                                                                                                                                                                                                                                                                            |                |               | 0                      | 11                        | 6.37      |
| At3g10810           | eFP TAIR Neighbours | zinc finger (C3HC4-type RING finger) family protein                                                                                                                                                                                                                                                                                                                                                                                                                                                         | Col ABA UP     |               | 1                      | 10                        | 6.37      |
| At5g24740           | eFP TAIR Neighbours | similar to unknown protein [Arabidopsis thaliana] (TAIR:AT4G17140.1); similar to hypothetical protein OsI_026627 [Oryza sativa (indica cultivar-group)] (GB:EAZ05395.1); similar to C-5 cytosine-specific DNA methylase; Vacuolar protein sorting-associated protein [Medicago truncatula] (GB:ABN08303.1); similar to hypothetical protein OsJ_024797 [Oryza sativa (japonica cultivar-group)] (GB:EAZ41314.1); contains InterPro domain Vacuolar protein sorting-associated protein; (InterPro:IPR009543) | Col ABA UP     |               | 9                      | 2                         | 6.37      |
| At4g33040           | eFP TAIR Neighbours | glutaredoxin family protein                                                                                                                                                                                                                                                                                                                                                                                                                                                                                 |                |               | 1                      | 11                        | 6.29      |
| At5g13980           | eFP TAIR Neighbours | glycosyl hydrolase family 38 protein                                                                                                                                                                                                                                                                                                                                                                                                                                                                        |                |               | 5                      | 7                         | 6.29      |
| At1g49400           | eFP TAIR Neighbours | EMB1129 (EMBRYO DEFECTIVE 1129); structural constituent of ribosome                                                                                                                                                                                                                                                                                                                                                                                                                                         |                |               | 0                      | 13                        | 6.21      |
| At3g03210           | eFP TAIR Neighbours | similar to unnamed protein product [Vitis vinifera] (GB:CAO22195.1)                                                                                                                                                                                                                                                                                                                                                                                                                                         |                |               | 0                      | 14                        | 6.13      |
| At1g19520           | eFP TAIR Neighbours | NFD5 (NUCLEAR FUSION DEFECTIVE 5); transcription factor                                                                                                                                                                                                                                                                                                                                                                                                                                                     |                |               | 0                      | 17                        | 5.94      |
| At5g15350           | eFP TAIR Neighbours | plastocyanin-like domain-containing protein                                                                                                                                                                                                                                                                                                                                                                                                                                                                 | Col ABA Down   | GA Up         | 0                      | 22                        | 5.68      |
| At3g18130           | eFP TAIR Neighbours | guanine nucleotide-binding family protein / activated protein kinase C receptor (RACK1)                                                                                                                                                                                                                                                                                                                                                                                                                     |                |               | 1                      | 27                        | 5.44      |
| At5g38830           | eFP TAIR Neighbours | tRNA synthetase class I (C) family protein                                                                                                                                                                                                                                                                                                                                                                                                                                                                  |                |               | 0                      | 28                        | 5.44      |
| At3g21700           | eFP TAIR Neighbours | GTP binding                                                                                                                                                                                                                                                                                                                                                                                                                                                                                                 | Col ABA UP     |               | 0                      | 29                        | 5.4       |
| At5g48300           | eFP TAIR Neighbours | ADG1 (ADP GLUCOSE PYROPHOSPHORYLASE SMALL SUBUNIT 1); glucose-1-phosphate adenylyltransferase                                                                                                                                                                                                                                                                                                                                                                                                               |                |               | 0                      | 29                        | 5.4       |
| At1g69526           | eFP TAIR Neighbours | UbiE/COQ5 methyltransferase family protein                                                                                                                                                                                                                                                                                                                                                                                                                                                                  | Col ABA Down   |               | 22                     | 11                        | 5.27      |
| At1g10170           | eFP TAIR Neighbours | ATNFXL1; transcription factor                                                                                                                                                                                                                                                                                                                                                                                                                                                                               | Col ABA UP     |               | 8                      | 33                        | 5.06      |
| At2g07707_AtMg00480 | eFP TAIR Neighbours |                                                                                                                                                                                                                                                                                                                                                                                                                                                                                                             |                |               | 1                      | 44                        | 4.96      |
| At5g56860           | eFP TAIR Neighbours | GNC (GATA, NITRATE-INDUCIBLE, CARBON METABOLISM-INVOLVED); transcription factor                                                                                                                                                                                                                                                                                                                                                                                                                             |                |               | 0                      | 45                        | 4.96      |
| At2g19860           | eFP TAIR Neighbours | ATHXK2 (HEXOKINASE 2); ATP binding / hexokinase                                                                                                                                                                                                                                                                                                                                                                                                                                                             |                |               | 0                      | 47                        | 4.92      |
| At5g13220           | eFP TAIR Neighbours | JAS1/JAZ10/TIFY9 (JASMONATE-ZIM-DOMAIN PROTEIN 10)                                                                                                                                                                                                                                                                                                                                                                                                                                                          |                |               | 0                      | 48                        | 4.9       |

|           |                     |                                                                                                                                                                                                                                                                                                            |            |  |   |     |      |
|-----------|---------------------|------------------------------------------------------------------------------------------------------------------------------------------------------------------------------------------------------------------------------------------------------------------------------------------------------------|------------|--|---|-----|------|
| At1g21740 | eFP TAIR Neighbours | similar to unknown protein [Arabidopsis thaliana] (TAIR:AT1G77500.1); similar to hypothetical protein [Vitis vinifera] (GB:CAN81539.1); contains InterPro domain Protein of unknown function DUF632 (InterPro:IPR006867); contains InterPro domain Protein of unknown function DUF630 (InterPro:IPR006868) | Col ABA UP |  | 0 | 50  | 4.86 |
| At5g65310 | eFP TAIR Neighbours | ATHB5 (ARABIDOPSIS THALIANA HOMEODOMAIN PROTEIN 5); transcription factor                                                                                                                                                                                                                                   |            |  | 0 | 81  | 4.38 |
| At3g10530 | eFP TAIR Neighbours | transducin family protein / WD-40 repeat family protein                                                                                                                                                                                                                                                    |            |  | 4 | 88  | 4.25 |
| At3g50340 | eFP TAIR Neighbours | similar to unknown protein [Arabidopsis thaliana] (TAIR:AT5G67020.1); similar to unknown protein [Oryza sativa (japonica cultivar-group)] (GB:BAD09363.1)                                                                                                                                                  | Col ABA UP |  | 0 | 127 | 3.93 |
| At4g14680 | eFP TAIR Neighbours | APS3 (ATP sulfurylase 2); sulfate adenylyltransferase (ATP)                                                                                                                                                                                                                                                |            |  | 1 | 170 | 3.63 |
| At1g21880 | eFP TAIR Neighbours | LYM1 (LYSM DOMAIN GPI-ANCHORED PROTEIN 1 PRECURSOR)                                                                                                                                                                                                                                                        |            |  | 0 | 208 | 3.43 |
| At4g05440 | eFP TAIR Neighbours | EDA35 (embryo sac development arrest 35)                                                                                                                                                                                                                                                                   |            |  | 0 | 370 | 2.86 |
| At3g54430 | eFP TAIR Neighbours | SRS6 (SHI-RELATED SEQUENCE 6)                                                                                                                                                                                                                                                                              |            |  | 0 | 488 | 2.58 |

Candidate gene *At5g63840* as identified on IL 4-3-2 putatively associated with glycolysis and copredicted genes as generated by SCoPNET available on <http://vseednet.nottingham.ac.uk>. The candidate gene is involved in cellulose biosynthetic processes with a glucosidase and hydrolase activity. The copredicted genes are supplied with the coprediction PMI values. Copredicted genes of relevance to glycolysis are highlighted in grey. Localization of gene candidates was achieved by utilizing data as analyzed on dry IL seeds of harvest seasons I and II in Akko, Israel.
