# Supplementary material for: Metabolic Profiling of a Mapping Population Exposes New Insights in the Regulation of Seed Metabolism and Seed, Fruit, and Plant Relations
Source: PLoS Genet. 2012 Mar 29;8(3):e1002612. doi: 10.1371/journal.pgen.1002612 (PMC3315483; doi:10.1371/journal.pgen.1002612)
Supplement: Table S8 — Fruit ILs ranked based on individual variances compared with overall average variance of seed IL population. Shown are the 25 fruit ILs chosen for the subset network parameters comparison with reference to the network parameters of the seed IL network. ILs were ranked based on their variance as compared with the average variances of the seed IL dataset. To show differences of variances F-statistics were applied to estimate p-values. None of the chosen ILs show significant differences between individual IL variance and overall average seed IL dataset variance. (PDF) [file pgen.1002612.s017.pdf]

Table S8. Fruit ILs ranked based on individual variances compared to overall average variance of seed IL population.

|                      | $\sigma^2$    | p of F-value statistics |
|----------------------|---------------|-------------------------|
| <b>Seed complete</b> | <b>0.4687</b> | -                       |
| Fruit IL1-4          | 0.4776        | 0.4323                  |
| Fruit IL3-2          | 0.4791        | 0.4337                  |
| Fruit IL8-3          | 0.48          | 0.4345                  |
| Fruit IL1-4-18       | 0.4846        | 0.4385                  |
| Fruit IL5-3          | 0.427         | 0.3846                  |
| Fruit IL9-2-5        | 0.5158        | 0.4644                  |
| Fruit IL5-4          | 0.4183        | 0.3757                  |
| Fruit IL10-2         | 0.5222        | 0.4694                  |
| Fruit IL3-4          | 0.4133        | 0.3705                  |
| Fruit IL4-3          | 0.3966        | 0.3529                  |
| Fruit IL9-3          | 0.5447        | 0.4863                  |
| Fruit IL9-1-2        | 0.5489        | 0.4893                  |
| Fruit IL2-4          | 0.5503        | 0.4903                  |
| Fruit IL1-1-3        | 0.5518        | 0.4914                  |
| Fruit M82            | 0.3602        | 0.3123                  |
| Fruit IL7-5-5        | 0.3597        | 0.3117                  |
| Fruit IL2-1-1        | 0.358         | 0.3098                  |
| Fruit IL3-5          | 0.5909        | 0.5174                  |
| Fruit IL10-3         | 0.3457        | 0.2955                  |
| Fruit IL1-1-2        | 0.3395        | 0.2881                  |
| Fruit IL4-2          | 0.3158        | 0.2595                  |
| Fruit IL7-4-1        | 0.3096        | 0.2519                  |
| Fruit IL12-2         | 0.3047        | 0.2459                  |
| Fruit IL9-2-6        | 0.2912        | 0.2292                  |
| Fruit IL11-1         | 0.2909        | 0.2287                  |

Shown are the 25 fruit ILs chosen to perform subset network parameters comparison in reference to the network parameters of the seed IL network. ILs were ranked based on their variance as compared to the average variances of the seed IL dataset. To show differences of variances F-statistics were applied to estimate p-values.

None of the chosen ILs show significant differences between individual IL variance and overall average seed IL dataset variance.
